# Supplementary material for: Isolation, Development, and Genomic Analysis of Bacillus megaterium SR7 for Growth and Metabolite Production Under Supercritical Carbon Dioxide
Source: Front Microbiol. 2018 Sep 25;9:2152. doi: 10.3389/fmicb.2018.02152 (PMC6167967; doi:10.3389/fmicb.2018.02152)
Supplement: Supplementary file 1 [file Data_Sheet_1.xlsx]

## Sheet: Table_S1
Table S1. Summary of microbial culturing media used in study
Use	Name	Base Medium (MS/LB/M9)	Media Supplements	Base Reference
Enrichment Passaging & Pure Culture	MS-SR	0.5 g/l YE, 0.5 g/l TP, 10 g/l NaCl, 1 g/l NH4Cl, 1 g/l MgCl26H2O, 0.4 g/l K2HPO4, 0.4 g/l CaCl2 b1X Trace Metals	aSulfates + Acetate	Colwell et al., 1997
Pure Culture	P-LB	5 g/l YE, 10 g/l Bacto-tryptone, 10 g/l NaCl	50 mM Disodium Phosphate	BD Difco™
	P-LBA		50 mM Disodium Phosphate + 100 mM L-alanine
	P-LBL		50 mM Disodium Phosphate + 10 mM L-leucine
	P-LBAL		50 mM Disodium Phosphate +100 mM L-alanine + 10 mM L-leucine
	M9+	12.8 g/l Na2HPO47H2O, 3 g/l KH2PO4, 0.5 g/l NaCl, 1 g/l NH4Cl, 2 mM MgSO4, 0.1 mM CaCl2	M9 + b0.1X trace metals + 50 mg/l YE + 4 g/l Glucose	Sigma-Aldrich™ (M9 Salt Solution)
	M9A+		M9 + b0.1X trace metals + 50 mg/l YE + 4 g/l Glucose + 100 mM L-alanine
a0.87 g/l K2SO4, 0.83 g/l FeSO47H2O, 0.82 g/l Na-Acetate
bTrace metals solution (Boone, 1989); YE = Yeast Extract; TP = Tryptic Peptone

## Sheet: Table_S2
Table S2. SR7 antibiotic/chemical sensitivity assay summary
aAntibiotic/Chemical	Sensitive (S)	% Controlc	Test
(concentration, μg/ml)	bResistant (R)
dPotassium Tellurite	R	1	Biolog Plate
d1% Sodium Lactate	R	0.99	Biolog Plate
dLithium Chloride	R	0.78	Biolog Plate
dSodium Butyrate	R	0.55	Biolog Plate
Spectinomycin (100)	R	0.47	LB Medium
dTetrazolium Violet	R	0.31	Biolog Plate
dSodium Bromate	R	0.25	Biolog Plate
dGuanidine HCl	R	0.23	Biolog Plate
dTetrazolium Blue	R	0.2	Biolog Plate
Nalidixic Acid	S	0.14	Biolog Plate
Tetracycline (1.5)	S	0.11	LB Medium
Minocycline	S	0.11	Biolog Plate
Lincomycin	S	0.11	Biolog Plate
Rifamycin SV	S	0.11	Biolog Plate
Aztreonam	S	0.1	Biolog Plate
Vancomycin	S	0.1	Biolog Plate
Streptomycin (10)	S	0.1	LB Medium
dD-Serine	S	0.1	Biolog Plate
Fusidic Acid	S	0.09	Biolog Plate
dNiaproof 4	S	0.09	Biolog Plate
Chloramphenicol (35)	S	0.09	LB Medium
Kanamycin (5)	S	0.09	LB Medium
Troleandomycin	S	0.09	Biolog Plate
Ampicilin (50)	S	0.08	LB Medium
aBiolog antibiotic concentrations are proprietary/unpublished
bResistant: >20% growth relative to unamended control
c(OD600 Treatment/OD600 Control) x 100, average of n = 2
dNon-antibiotic treatment

## Sheet: Table_S3
Table S3. M9 and LB supplemented growth outcomes under 1 atm CO2
M9 Amendments	*Growth
M9 Salts Control (no carbon source)	-
4 g/l Glucose	-
4 g/l Xylose	-
4 g/l Glucose + 1X Metals	-
4 g/l Xylose + 1X Metals	-
0.001X LB	-
0.01X LB	-
0.001X YE	-
0.01X YE	-
0.001X LB + 4 g/l Glucose	-
0.01X LB + 4 g/l Glucose	-
0.01X YE + 4 g/l Glucose	-
0.01X YE + 4 g/l Glucose + 5 mM NaNO3	-
0.001X LB + 4 g/l Glucose + 5 mM NaNO3	-
0.01X LB + 4 g/l Glucose + 5 mM NaNO3	-
0.001X LB + 4 g/l Glucose + 0.1X Metals	+++
0.01X LB + 4 g/l Glucose + 0.1X Metals	+++
0.01X YE + 4 g/l Glucose + 0.1X Metals	+++
0.01X YE + 4 g/l Glucose + 1X Metals	+++
0.01X LB + 4 g/l Glucose + 5 mM NaNO3 + 0.1X Metals	+++
0.01X YE + 4 g/l Glucose + 5 mM NaNO3 + 0.1X Metals	+++
0.01X YE + 4 g/l Glucose + 0.1X Metals + 100 mM L-Alanine	+++
0.01X YE + 4 g/l Glucose + 0.1X Metals + 25 mM L-Leucine	+++
LB Amendments	*Growth
Unamended Control	+++
0.1X Metals	+++
100 mM L-Alanine	+++
0.1X Metals + 100 mM L-Alanine	+++
4 g/l Glucose	+
4 g/l Glucose + 0.1X Metals	+
4 g/l Glucose + 0.1X Metals + 100 mM L-Alanine	+
4 g/l Glucose + 100 mM L-Alanine	+
LEGEND
LB/Yeast Extract (YE) Dilutions	*Growth (Plate Reader)
0.01X LB = 100 mg/l tryptone, 50 mg/l YE, 100 mg/l NaCl	OD600 > 0.6	+++
0.001X LB = 10 mg/l tryptone, 5 mg/l YE, 10 mg/l NaCl	0.6 > OD600 > 0.2	+
0.01X YE = 50 mg/l; 0.001X YE = 5 mg/l	OD600 < 0.2	-
1X Metals:
5 mg/l Na2(EDTA), 0.2 mg/l NiSO46H2O, 0.5 mg/l CoCl26H2O, 0.1 mg/l H2FeO3, 1 mg/l FeSO47H2O, 0.1 mg/l H3BO3, 1 mg/l ZnCl2, 0.1 mg/l NaMoO42H2O,0.4 mg/l AlCl36H2O, 1 mg/l MnCl24H2O, 0.3 mg/l Na2NO42H2O, 0.2 mg/l CaCl2

## Sheet: Table_S4
Table S4. SR7 robust (+++), marginal (+), and no (-) growth on sole carbon source in unamended control and trace metals-amended Biolog plates. Maximum growth per plate noted by an asterisk
Carbon Substrate	Control	+Metals		Carbon Substrate	Control	+Metals
Citric Acid	+++*	+++		D-Trehalose	+	+
α-D-Glucose	+	+++		β-Methyl-D-Glucoside	+	+
L-Arginine	+	+++		Sucrose	+	+
D-Gluconic Acid	+	+++		Inosine	+	+
L-Aspartic Acid	+	+++		D-Sorbitol	-	+
N-Acetyl-D- Glucosamine	+	+++*		3-Methyl Glucose	-	+
L-Glutamic Acid	+	+++		D-Glucuronic Acid	+	-
D-Turanose	+	+++		Acetic Acid	+	-
L-Pyroglutamic Acid	+	+++		L-Serine	+	-
D-Raffinose	+	+++		Tween 40	+	-
γ-Amino-Butryric Acid	+	+++		D-Galacturonic Acid	+	-
myo-Inositol	+	+++		L-Galactonic Acid Lactone	+	-
L-Malic Acid	+++	+		Acetoacetic Acid	+	-
Gelatin	+	+		Mucic Acid	+	-
Pectin	+	+		Propionic Acid	+	-
Dextrin	+	+		Quinic Acid	+	-
α-D-Lactose	+	+		D-Saccharic Acid	+	-
D-Mannitol	+	+		D-Fructose- 6-PO4	-	-
Methyl Pyruvate	+	+		N-Acetyl-D- Galactosamine	-	-
D-Melibiose	+	+		Formic Acid	-	-
D-Fructose	+	+		Negative Control	-	-
D-Arabitol	+	+		p-Hydroxy- Phenylacetic Acid	-	-
L-Alanine	+	+		D-Mannose	-	-
D-Lactic Acid Methyl Ester	+	+		Glycyl-L-Proline	-	-
D-Galactose	+	+		α-Hydroxy- Butyric Acid	-	-
L-Lactic Acid	+	+		α-Keto-Butyric Acid	-	-
β-Hydroxy-D,L- Butyric Acid	+	+		D-Fucose	-	-
D-Cellobiose	+	+		D-Glucose- 6-PO4	-	-
D-Salicin	+	+		Glucuronamide	-	-
Glycerol	+	+		N-Acetyl-β-D- Mannosamine	-	-
Gentiobiose	+	+		L-Fucose	-	-
α-Keto-Glutaric Acid	+	+		D-Malic Acid	-	-
L-Histidine	+	+		L-Rhamnose	-	-
Stachyose	+	+		D-Aspartic Acid	-	-
Bromo-Succinic Acid	+	+		N-Acetyl Neuraminic Acid	-	-
D-Maltose	+	+		D-Serine	-	-

## Sheet: Table_S5
Table S5. B. megaterium strains categorized by robust (+++), marginal (+), or no (-) growth on Biolog sole carbon sources (no metals added). Substrates enabling robust growth by at least one strain listed.
Carbon Substrate	SR7	DSM319	QM B1551
Citric Acid	+++	+++	+++
L-Malic Acid	+++	+++	+++
L-Lactic Acid	+	+++	+++
L-Glutamic Acid	+	+++	+++
α-D-Glucose	+	+++	+
Dextrin	+	+++	+
D-Mannitol	+	+++	+
D-Gluconic Acid	+	+++	+
L-Aspartic Acid	+	+++	+
N-Acetyl-D- Glucosamine	+	+++	+
L-Histidine	+	+++	+
Bromo-Succinic Acid	+	+++	+
D-Maltose	-	+++	+
Sucrose	-	+++	+
β-Hydroxy-D,L-Butyric Acid	+	+	+++
D-Saccharic Acid	-	-	+++

## Sheet: Table_S6
Table S6. Summary of germination-induction incubation outcomes under scCO2
Incubation	Duration	Media	*Column Growth
A	18 days	P-LB	3/7
		P-LBA	5/7
		P-LBA (+ Heat)	3/6
		P-LBL	1/7
		P-LBAL	2/7
		Neg Ctrl	0/4
B	20 days	P-LB	1/7
		P-LBA	5/7
		P-LBL	0/6
		P-LBAL	2/6
		Neg Ctrl	0/4
C	18 days	P-LB	1/6
		P-LBA	3/5
		Neg Ctrl	0/4
*Columns showing SR7 growth under scCO2 out of total incubated columns, growth defined as at least ten-fold increase in cell concentration relative to t0

## Sheet: Table_S7
Table S7. RAST-called ORF gene annotations unique to SR7 relative to B. megaterium strains QM B1551, DSM319 and WSH-002 (annotated ORFs listed under yellow columns, hypothetical/unknown function ORFs listed under orange column)
RAST-annotated ORFs unique to SR7 (n = 294)				Hypothetical/unknown function ORFs unique to SR7 (n = 72)
(2E,6E)-farnesyl diphosphate synthase (EC 2.5.1.10)	DnaJ-class molecular chaperone CbpA	O-antigen flippase Wzx	Regulatory protein spx	BH0622 unknown conserved protein in B. subtilis
(R)-2-hydroxyacid dehydrogenase, similar to L-sulfolactate dehydrogenase (EC 1.1.1.272)	DnaK suppressor protein	Oligoendopeptidase F (EC 3.4.24.-)	replication terminator protein	BH1777 unknown conserved protein
1,4-dihydroxy-2-naphthoate polyprenyltransferase (EC 2.5.1.74)	endopeptidase, cell wall lytic activity	Oligosaccharide repeat unit polymerase Wzy	Replicative DNA helicase (DnaB) (EC 3.6.4.12)	BH2600 unknown conserved protein in B. subtilis
2-dehydro-3-deoxyphosphogluconate aldolase (EC 4.1.2.14) in D-glucosaminate utilization operon	Epoxyqueuosine (oQ) reductase QueG	oxidoreductase ylbE	Repressor CsoR of the copZA operon	BH2610 unknown
2-heptaprenyl-1,4-naphthoquinone methyltransferase (EC 2.1.1.163)	Fatty-acid desaturase (EC 1.14.99.-)	Oxidoreductase, aldo/keto reductase family protein	Response regulator of zinc sigma-54-dependent two-component system	BH2866 unknown conserved protein in B. subtilis
2-hydroxy-3-keto-5-methylthiopentenyl-1-phosphate phosphatase (EC 3.1.3.87)	FIG000325: clustered with transcription termination protein NusA	pentapeptide repeat containing protein	Ribonuclease HI, Bacillus nonfunctional homolog	bll0405; hypothetical protein
2-methylaconitate cis-trans isomerase	FIG002434: Uncharacterized protein YtpQ	Peptide transport system permease protein sapB (TC 3.A.1.5.5)	Ribonuclease J1 (endonuclease and 5' exonuclease)	Domain of unknown function DUF1537
2,3-diketo-5-methylthiopentyl-1-phosphate enolase (EC 5.3.2.5)	FIG002813: LPPG:FO 2-phospho-L-lactate transferase like, CofD-like	peptidoglycan lytic protein P45	Ribonuclease J2 (endoribonuclease in RNA processing)	FIG001886: Cytoplasmic hypothetical protein
3-hydroxyacyl-[acyl-carrier-protein] dehydratase, FabZ form (EC 4.2.1.59)	FIG00672904: membrane protein YqhQ	periplasmic binding protein/LacI transcriptional regulator	ribosomal RNA adenine dimethylase domain protein	FIG001943: hypothetical protein YajQ
3-oxoacyl-[acyl-carrier protein] reductase paralog (EC 1.1.1.100) in cluster with unspecified monosaccharide transporter	FIG00732228: membrane protein	Permeases of the drug/metabolite transporter (DMT) superfamily	Ribosomal silencing factor RsfA (former Iojap)	FIG00526649: hypothetical protein
3-oxoacyl-[acyl-carrier-protein] synthase, KASII (EC 2.3.1.179)	FIG00761799: membrane protein	Phage capsid and scaffold	RNA polymerase sigma factor SigX	FIG00544632: hypothetical protein
3-oxoacyl-[acyl-carrier-protein] synthase, KASIII (EC 2.3.1.180)	FIG139438: lipoprotein B	Phage capsid protein	rRNA small subunit 7-methylguanosine (m7G) methyltransferase GidB	FIG00553873: hypothetical protein
4-amino-6-deoxy-N-Acetyl-D-hexosaminyl-(Lipid carrier) acetyltrasferase	FOG: GGDEF domain	Phage DNA invertase	S-methylmethionine permease	FIG00629163: hypothetical protein
4-hydroxy-2-oxoglutarate aldolase (EC 4.1.3.16) @ 2-dehydro-3-deoxyphosphogluconate aldolase (EC 4.1.2.14)	Free methionine-(R)-sulfoxide reductase, contains GAF domain	Phage head maturation protease	SA_27: YycH protein	FIG00646845: hypothetical YMCA protein
4-hydroxy-2-oxovalerate aldolase (EC 4.1.3.39)	FtsK/SpoIIIE family protein, putative EssC component of Type VII secretion system	Phage Holliday junction resolvase	Salicylate hydroxylase (EC 1.14.13.1)	FIG00672725: hypothetical protein
4-hydroxy-tetrahydrodipicolinate reductase (EC 1.17.1.8)	Fumarylacetoacetase (EC 3.7.1.2)	Phage integrase	Sensor protein of zinc sigma-54-dependent two-component system	FIG00673439: hypothetical protein
4-hydroxy-tetrahydrodipicolinate synthase (EC 4.3.3.7)	gamma-aminobutyrate (GABA) permease	Phage major tail protein phi13	sensory box histidine kinase/response regulator	FIG00673721: hypothetical protein
4-hydroxyphenylpyruvate dioxygenase (EC 1.13.11.27)	Gas vesicle protein GvpA	Phage minor capsid protein #Fam0038	Serine-protein kinase RsbW (EC 2.7.11.1)	FIG00673996: hypothetical protein
5-methylcytosine-specific restriction enzyme A (EC 3.1.21.-)	GlpG protein (membrane protein of glp regulon)	Phage portal protein	Serine/threonine protein kinase	FIG00674186: hypothetical protein
5'-methylthioadenosine nucleosidase (EC 3.2.2.16) @ S-adenosylhomocysteine nucleosidase (EC 3.2.2.9)	Gluconate permease, Bsu4004 homolog	Phage tail fibers	Shikimate 5-dehydrogenase I gamma (EC 1.1.1.25)	FIG00674791: hypothetical protein
6 kDa early secretory antigenic target ESAT-6 (EsxA)	Glutamate 5-kinase (EC 2.7.2.11) / RNA-binding C-terminal domain PUA	Phage tail length tape-measure protein	Short-chain dehydrogenase/reductase SDR	FIG00756488: hypothetical protein
6-carboxytetrahydropterin synthase (EC 4.1.2.50) @ Queuosine biosynthesis QueD, PTPS-I	glycosyl transferase, family 2	Phage terminase small subunit	Single stranded DNA-binding protein, phage-associated #ACLAME218	FIG00774061: hypothetical protein
AB hydrolase superfamily protein YdjP	GTP-binding protein Obg	Phage terminase, large subunit	Small uncharacterized protein Bpro_4170	FIG00774243: hypothetical protein YlaN
Acetate permease ActP (cation/acetate symporter)	Hexuronate transporter	Phage terminase, small subunit	Small-conductance mechanosensitive channel	FIG00819610: hypothetical protein
Acetoacetate metabolism regulatory protein AtoC	HigA protein (antitoxin to HigB)	Phage-related protein	Small, acid-soluble spore protein N	FIG01041883: hypothetical protein
Acetoacetyl-CoA synthetase (EC 6.2.1.16) / Long-chain-fatty-acid--CoA ligase (EC 6.2.1.3)	HMP-PP hydrolase (pyridoxal phosphatase) Cof, detected in genetic screen for thiamin metabolic genes (PMID:15292217)	PhnO protein	Sodium-dependent phosphate transporter	FIG01055109: hypothetical protein
acetyltransferase, putative	Homogentisate 1,2-dioxygenase (EC 1.13.11.5)	Phosphate regulon transcriptional regulatory protein PhoB (SphR)	Sorbitol-6-phosphate 2-dehydrogenase (EC 1.1.1.140)	FIG01201438: hypothetical protein
Acyl-CoA dehydrogenase (EC 1.3.8.7)	Hydroxyacylglutathione hydrolase (EC 3.1.2.6)	Phosphoglycolate phosphatase (EC 3.1.3.18)	Sporulation control protein Spo0M	FIG01225251: hypothetical protein
Adenosylcobinamide-phosphate synthase (EC 6.3.1.10)	Hydroxyaromatic non-oxidative decarboxylase protein B (EC 4.1.1.-)	Phospholipase/carboxylesterase	Sporulation kinase A (EC 2.7.13.3)	FIG01225951: hypothetical protein
Altronate dehydratase (EC 4.2.1.7)	Hydroxymethylpyrimidine phosphate synthase ThiC (EC 4.1.99.17)	Phosphomethylpyrimidine kinase (EC 2.7.4.7)	Squalene--hopene cyclase (EC 5.4.99.17)	FIG01226141: hypothetical protein
Anti-sigma F factor antagonist (spoIIAA-2); Anti-sigma B factor antagonist RsbV	Hypothetical radical SAM family enzyme in heat shock gene cluster, similarity with CPO of BS HemN-type	Phosphonate ABC transporter phosphate-binding periplasmic component (TC 3.A.1.9.1)	SSU ribosomal protein S14p (S29e) @ SSU ribosomal protein S14p (S29e), zinc-dependent	FIG01226254: hypothetical protein
AraC-family transcriptional regulator	Inosine-5'-monophosphate dehydrogenase (EC 1.1.1.205) / CBS domain	Plant-induced nitrilase (EC 3.5.5.1), hydrolyses beta-cyano-L-alanine	SSU ribosomal protein S14p (S29e) @ SSU ribosomal protein S14p (S29e), zinc-independent	FIG01226470: hypothetical protein
aromatic hydrocarbon catabolism protein	Integrase	Possible carboxymuconolactone decarboxylase family protein (EC 4.1.1.44)	SSU rRNA (adenine(1518)-N(6)/adenine(1519)-N(6))-dimethyltransferase (EC 2.1.1.182)	FIG01226497: hypothetical protein
Aromatic-amino-acid aminotransferase (EC 2.6.1.57)	Integrase [Bacteriophage A118]	possible glycosyltransferase	Starvation sensing protein RspB	FIG01228225: hypothetical protein
Aspartate-proton symporter	intracellular protease, PfpI family	predicted biotin regulatory protein BioR (GntR family)	Sucrose-6-phosphate hydrolase (EC 3.2.1.B3)	FIG01228316: hypothetical protein
ATP synthase F0 sector subunit a	L-asparaginase I, cytoplasmic (EC 3.5.1.1)	Predicted nucleoside phosphatase	Syd protein	FIG01228465: hypothetical protein
ATP synthase F0 sector subunit b	Late competence protein ComER, similarity with Pyrroline-5-carboxylate reductase	Predicted sodium-dependent galactose transporter	Tartrate dehydrogenase (EC 1.1.1.93) @ Tartrate decarboxylase (EC 4.1.1.73) @ D-malic enzyme (EC 1.1.1.83)	FIG01228561: hypothetical protein
ATP synthase F0 sector subunit c	Late competence protein ComGF, access of DNA to ComEA, FIG012620	Probable bifunctional P-450/NADPH-P450 reductase CypD	TetR family transcriptional regulator Bsu YvdT	FIG01229143: hypothetical protein
ATP:Cob(I)alamin adenosyltransferase (EC 2.5.1.17)	Leucine-responsive regulatory protein, regulator for leucine (or lrp) regulon and high-affinity branched-chain amino acid transport system	Probable lipoprotein signal peptide	Tetraprenyl-beta-curcumene synthase (EC 4.2.3.130)	FIG01230579: hypothetical protein
Azurin	LexA repressor (EC 3.4.21.88)	probable multidrug-efflux transporter	Tetratrico-peptide repeat (TPR) protein within ESAT-6 gene cluster	FIG01230826: hypothetical protein
B12 binding domain protein	lin0150	Proline/sodium symporter PutP (TC 2.A.21.2.1) @ Propionate/sodium symporter	Tetratricopeptide repeat family protein	FIG01231130: hypothetical protein
Beta-hexosaminidase (EC 3.2.1.52)	Lipid carrier : UDP-N-acetylgalactosaminyltransferase (EC 2.4.1.-)	Prolyl-tRNA synthetase (EC 6.1.1.15), bacterial type	Thiaminase II (EC 3.5.99.2) involved in salvage of thiamin pyrimidine moiety	FIG01231542: hypothetical protein
Beta-ketoadipate enol-lactone hydrolase (EC 3.1.1.24)	Lipid carrier : UDP-N-acetylgalactosaminyltransferase (EC 2.4.1.-) / Alpha-1,3-N-acetylgalactosamine transferase PglA (EC 2.4.1.-); Putative glycosyltransferase	Prophage Lp2 protein 6	TPR domain protein, putative component of TonB system	FIG01232032: hypothetical protein
Biotin synthesis protein BioH	Lipopolysaccharide biosynthesis protein RffA	Protein gp47, recombination-related [Bacteriophage A118]	transcriptional regulator, MarR family	FIG01233539: hypothetical protein
Biotin--protein ligase (EC 6.3.4.9, EC 6.3.4.10, EC 6.3.4.11, EC 6.3.4.15) / Biotin operon repressor	Lipoteichoic acid primase LtaP	Protein-N(5)-glutamine methyltransferase PrmC, methylates polypeptide chain release factors RF1 and RF2	transcriptional regulator, TetR family	FIG01234012: hypothetical protein
Bona fide RidA/YjgF/TdcF/RutC subgroup	LLAKR2I restriction enzyme	PspC domain protein	Transcriptional regulatory protein basR/pmrA	FIG01234179: hypothetical protein
Carboxymethylenebutenolidase-related protein	Long-chain-fatty-acid--CoA ligase (EC 6.2.1.3) / Acetoacetyl-CoA synthetase [leucine] (EC 6.2.1.16)	PTS system, beta-glucoside-specific IIB component (EC 2.7.1.69) / PTS system, beta-glucoside-specific IIC component / PTS system, beta-glucoside-specific IIA component	transporter	FIG01234510: hypothetical protein
Carboxysome protein CcmM	LSU ribosomal protein L31p @ LSU ribosomal protein L31p, zinc-dependent	PTS system, glucose-specific IIC component / PTS system, glucose-specific IIB component (EC 2.7.1.69) / PTS system, glucose-specific IIA component	TRAP transporter solute receptor, TAXI family precursor	FIG01236749: hypothetical protein
CDS_ID OB2857	LSU ribosomal protein L31p @ LSU ribosomal protein L31p, zinc-independent	PTS system, mannitol-specific IIC component (EC 2.7.1.69) / PTS system, mannitol-specific IIB component (EC 2.7.1.69) / PTS system, mannitol-specific IIA component	Tricarboxylate transport protein TctC	FIG01238107: hypothetical protein
CDS_ID OB2888	LSU ribosomal protein L33p @ LSU ribosomal protein L33p, zinc-dependent	PTS system, mannose-specific IIA component (EC 2.7.1.69) / PTS system, mannose-specific IIB component (EC 2.7.1.69)	tRNA (5-methylaminomethyl-2-thiouridylate)-methyltransferase (EC 2.1.1.61) / FAD-dependent cmnm(5)s(2)U34 oxidoreductase	FIG01238735: hypothetical protein
Cell division protein DivIC (FtsB), stabilizes FtsL against RasP cleavage	LysM domain protein	PTS system, mannose-specific IIA component @ PTS system, fructose-specific IIA component	tRNA (adenine37-N(6))-methyltransferase TrmN6 (EC 2.1.1.223)	FIG01238856: hypothetical protein
cell wall teichoic acid glycosylation protein GtcA	Lyzozyme M1 (1,4-beta-N-acetylmuramidase) (EC 3.2.1.17)	PTS system, mannose-specific IIC component @ PTS system, fructose-specific IIC component	tRNA (cytidine(34)-2'-O)-methyltransferase (EC 2.1.1.207)	FIG01241730: hypothetical protein
Chloramphenicol resistance protein	Magnesium and cobalt efflux protein CorC	PTS system, mannose-specific IID component @ PTS system, fructose-specific IID component (EC 2.7.1.69)	tRNA dimethylallyltransferase (EC 2.5.1.75)	FIG01243524: hypothetical protein
Chromosome (plasmid) partitioning protein ParA	Maltose/maltodextrin ABC transporter, substrate binding periplasmic protein MalE	PTS system, N-acetylmuramic acid-specific IIB component (EC 2.7.1.69) / PTS system, N-acetylmuramic acid-specific IIC component	tRNA-t(6)A37 methylthiotransferase	FIG01244938: hypothetical protein
Chromosome (plasmid) partitioning protein ParB	Mannonate dehydratase (EC 4.2.1.8)	Putative arylsulfatase regulatory protein	tRNA(Ile)-lysidine synthetase (EC 6.3.4.19)	FIG01247699: hypothetical protein
Chromosome initiation inhibitor	Mannose-6-phosphate isomerase (EC 5.3.1.8)	putative bacteriophage protein	TsaB protein, required for threonylcarbamoyladenosine (t(6)A) formation in tRNA	FIG01248464: hypothetical protein
Chromosome replication initiation protein DnaD	Membrane alanine aminopeptidase N (EC 3.4.11.2)	Putative bacteriophage protein	TsaC protein (YrdC domain) required for threonylcarbamoyladenosine t(6)A37 modification in tRNA	FIG01249277: hypothetical protein
Cobyric acid synthase (EC 6.3.5.10)	Membrane-associated protein containing RNA-binding TRAM domain and ribonuclease PIN-domain, YacL B.subtilis ortholog	Putative EsaC protein analog (Listeria type 3)	TsaD/Kae1/Qri7 protein, required for threonylcarbamoyladenosine t(6)A37 formation in tRNA	FIG01250505: hypothetical protein
Conserved protein	Membrane-bound metal-dependent hydrolase YdjM, induced during SOS response	Putative ESAT-secreted protein, BA2187 homolog	TsaE protein, required for threonylcarbamoyladenosine t(6)A37 formation in tRNA	FIG01252487: hypothetical protein
Copper(I) chaperone CopZ	Mlr7069 protein	Putative ESAT-secreted protein, BA2188 homolog	two-component hybrid sensor and regulator	FIG01252586: hypothetical protein
Cystathionine beta-lyase, type II (EC 4.4.1.8)	Molybdenum cofactor biosynthesis protein MoaD	Putative FMN hydrolase (EC 3.1.3.-); 5-Amino-6-(5'-phosphoribitylamino)uracil phosphatase	UDP-glucuronate 5'-epimerase (EC 5.1.3.12)	FIG01253263: hypothetical protein
Cytidylate kinase (EC 2.7.4.25)	multidrug-efflux transporter, putative	Putative Holliday junction resolvase YqgF	Uncharacterised protein family UPF0157 (COG2320)	FIG01308914: hypothetical protein YwzC
Cytochrome c-type biogenesis protein DsbD, protein-disulfide reductase (EC 1.8.1.8)	Multiple antibiotic resistance protein marC	putative inner membrane efflux protein	Uncharacterized conserved protein, contains double-stranded beta-helix domain	FIG018171: hypothetical protein of Cupin superfamily
D-arabino-3-hexulose 6-phosphate formaldehyde-lyase (EC 4.1.2.43)	N-Acetyl-D-glucosamine ABC transport system, permease protein 2	putative N-myristoyl transferase	Uncharacterized protein YpeP	FIG062906: hypothetical Membrane Spanning Protein
D-Glucosaminate-6-phosphate ammonia-lyase (EC 4.3.1.-)	N-acetylglutamate synthase (EC 2.3.1.1)	putative protein	Undecaprenyl diphosphate synthase (EC 2.5.1.31)	FIG074102: hypothetical protein
D-tyrosyl-tRNA(Tyr) deacylase (EC 3.6.1.n1)	N-acetylmuramic acid 6-phosphate etherase	putative sugar phosphate isomerase/epimerase	UPF0154 membrane protein YoxG	FIG075815: hypothetical protein
DEAD-box ATP-dependent RNA helicase CshA (EC 3.6.4.13)	N-Acyltransferase superfamily / Uncharacterised protein family UPF0157 (COG2320)	putative transporter, trans-membrane domain bacteriocin immunity protein	Uridine monophosphate kinase (EC 2.7.4.22)	Hypothetical protein SAV1839
DEAD-box ATP-dependent RNA helicase CshB (EC 3.6.4.13)	N-formylglutamate deformylase (EC 3.5.1.68)	PXO1-97	YDFR protein	Hypothetical protein, CF-21 family
Diadenylate cyclase spyDAC; Bacterial checkpoint controller DisA with nucleotide-binding domain	Na+/H+ antiporter NhaP	Pyridoxamine 5'-phosphate oxidase (EC 1.4.3.5)	YKOJ	Hypothetical protein, CF-22 family
Dihydrofolate synthase (EC 6.3.2.12) @ Folylpolyglutamate synthase (EC 6.3.2.17)	NADPH-dependent 7-cyano-7-deazaguanine reductase (EC 1.7.1.13)	Pyrophosphatase PpaX (EC 3.6.1.1)	YozN	Hypothetical protein, CF-23 family
DinB family protein	NTD biosynthesis operon regulator NtdR	Pyruvate carboxylase (EC 6.4.1.1)	YqjY	Protein of unknown function DUF1446
DNA primase/helicase, phage-associated	nuclease	Quaternary ammonium compound-resistance protein SugE	Zinc transport protein ZntB	Protein of unknown function DUF405:Protein of unknown function DUF418
DNA-cytosine methyltransferase (EC 2.1.1.37)	Nucleoside ABC transporter, permease protein 1	Recombinational DNA repair protein RecT (prophage associated)
DNA, complete sequence	Nucleoside-diphosphate-sugar epimerases	RecU Holliday junction resolvase

## Sheet: Table_S8
Table S8. SR7 putative plasmid RAST/Blastp functional annotations, statistical summary, and nucleotide and amino acid sequences for RAST-called ORFs
Legend	Plasmid-associated annotation or detected on Bacillus spp. plasmids
	Sporulation/germination-associated annotation
Plasmid	RAST ORF #	Length (bp)	RAST Annotation	Top BlastP Descriptive Hit	Max score	Query cover	E value	ID%	Accession	Nucleotide Sequence	Amino Acid Sequence
p1	1	161	hypothetical protein	DNA-binding protein [Bacillus cereus]	37.7	0.83	0.23	0.48	WP_016104025.1	atgataaagaaaatagaaaaaagatctgaagaacgagatgataatcttatgtctgtaattagatcaatccaagaagaaaaagaagaagttaaacaattaattgcagcttctcaagaacaagaaaagaagactttctggcaacgacttttcagtagaatctaa	MIKKIEKRSEERDDNLMSVIRSIQEEKEEVKQLIAASQEQEKKTFWQRLFSRI
p1	2	188	hypothetical protein	Rep protein [Bacillus megaterium]	84.3	0.67	4e-18	0.93	WP_047934479.1	atgatttgtgctccgagaaaaaatgaagtgaaattagataaattaactatgaggctatttaaacactcattaaaaaatcttaaagatcaagatggtaaaaaagtaaaattacctgttagattttttttagactctatcatatttgatagagtctcttttatatgcttattggaaaattataggtgttag	MICAPRKNEVKLDKLTMRLFKHSLKNLKDQDGKKVKLPVRFFLDSIIFDRVSFICLLENYRC
p1	3	113	hypothetical protein	Rep protein [Bacillus sp. GeD10]	52.8	0.7	4e-07	1	WP_006921676.1	atgattgggaagtcacgtacacaaacatctttaatattgaactcattgaaagaaaaagagatcttgttaaaccctgaggagcaggccaaattgaagagaacggaagaactgtaa	MIGKSRTQTSLILNSLKEKEILLNPEEQAKLKRTEEL
p1	4	203	hypothetical protein	Rep protein [Bacillus sp. GeD10]	88.6	0.88	1e-19	0.75	WP_006921676.1	atgaaaagtgtaagaacggctttaaacgaagctgaaaagaaagctagattgaaggattttgagaaagatttaacagtcagaacagaagctgaggaaataaaaaaatctttgttaaataagttgactgaacttactggagaaaagcactacattggtaaagaaaaagatccttttgcagggagccgtttatcaagttatgcatag	MKSVRTALNEAEKKARLKDFEKDLTVRTEAEEIKKSLLNKLTELTGEKHYIGKEKDPFAGSRLSSYA
p1	5	413	hypothetical protein	protein DnrP [Pseudomonas mendocina]	36.6	0.21	0.7	0.47	WP_041975795.1	atgaaatgtttatattgtgattcagaaaataattctacggatcaagcatgttcagtttgtggagcacctttacatacaaagcgtcctcaacttaaagaatatgtgagtctacaagattcagctttatcattcgaagatcttcaacgttttcatacgtatgacttgttagtattgcttcgtttggttcgagaagagcgttcaaaaagctataatttgatgagaacggttcagaaggctccagaaggagttgagattgataaaagtgtaatagagttcggagaaagcgaatatcgcctttatacagctcgtatgaagctcatagagggtcttttagtagaccggatggggtacaagcctaaacgagtggatgataagctgcttgcagcgttaaaacaccga…	MKCLYCDSENNSTDQACSVCGAPLHTKRPQLKEYVSLQDSALSFEDLQRFHTYDLLVLLRLVREERSKSYNLMRTVQKAPEGVEIDKSVIEFGESEYRLYTARMKLIEGLLVDRMGYKPKRVDDKLLAALKHRIESK
p1	6	131	hypothetical protein	hypothetical protein [Bacillus flexus]	60.5	0.72	3e-10	0.94	WP_050691717.1	gtgaagaagaagcagaaaagattgccaaggcgttgcaattatgtaggtaaaaataaagataagattttgcatcacgatgtggttgtaaaagaaaaaaagaaagcagcagctgaaatagctgtttctgaatag	MKKKQKRLPRRCNYVGKNKDKILHHDVVVKEKKKAAAEIAVSE
p1	7	131	hypothetical protein	hypothetical protein [Bacillus megaterium]	54.3	0.65	5e-08	1	WP_047933925.1	gtgccaaagaagcgaacggatgaggaaattcttcaggagttagaagagaaaattgagaagatgaaagcgaagaaacaacaagttgaggcgcgtaaaaaagaaaaagaaagaaaaagagaacaagacgattga	MPKKRTDEEILQELEEKIEKMKAKKQQVEARKKEKERKREQDD
p1	8	308	Conjugal transfer protein TraA	molybdopterin-guanine dinucleotide biosynthesis protein MobA [Bacillus megaterium]	209	0.99	1e-61	0.97	WP_047934263.1	atggctatctaccatctatcgatgcaaatcatcagtcgttcaaaaggacaatcagctgtcgctgcagctgcttatcgcagtggcgaaaaactacatgatgaacgtacagacgagcaaaagttttatggtcgtaatgtacaaccggaaaccatgattctgactcctaccaatgcgccagaatggatgaaagatcgtaatcgtttgtggaatgaagttgaaaaagtcgaaaaacgcaaagactcacagttagcacgagaattaaacattgcgttaccaattgaactaaaccacgatcaacaaaagaactga	MAIYHLSMQIISRSKGQSAVAAAAYRSGEKLHDERTDEQKFYGRNVQPETMILTPTNAPEWMKDRNRLWNEVEKVEKRKDSQLARELNIALPIELNHDQQKN
p1	9	1634	Conjugal transfer protein TraA	molybdopterin-guanine dinucleotide biosynthesis protein MobA [Bacillus flexus]	992	1	0	0.88	WP_025907861.1	atggttgctgatattgctattcatcgtgatgacactaataatcctcatgcccacatcatgttaacgatgagaaatcttgatgagaatggtttcggcaaaaagaatcgtgactggaatgctgattttgcgaatgccaaagaaaacaatcgtgggtacgtcaaaaatagcgaaggctgcttatccattcgtgaacagtgggcaaactatgccaataaagcattagaacaagccaaaagtaaagagcgtattacgcacctttctcatgaaaatcgtggacttgaagtccttccaaccattcacttagggcatgtcgctcatgacatggagaaaaaagggaagaagagcaaacgtggcgagattaacagagaacgccaagaatataatcaagctgtcattgat…	MVADIAIHRDDTNNPHAHIMLTMRNLDENGFGKKNRDWNADFANAKENNRGYVKNSEGCLSIREQWANYANKALEQAKSKERITHLSHENRGLEVLPTIHLGHVAHDMEKKGKKSKRGEINRERQEYNQAVIDLQAYRRQKEAHVKKMKEKEKQFSFSTDIEKTYIQKAASILNQKVISLDDISKRQEELRKMSDRHDPIERHFHVQQQQYLNVSNYYDRVRDLSREIKQNEEKVEELKGSLNPFKLKENNMMKRRHLDKISDLESNKLSYENNIKTYKESLRFSNEEEFYERYKEFSEQKENRLYQIKYEKQQIQVETKVLLQAEEAIKTAKIREVSSHYPDLKTAGKYLSYENALKLEKHIDMAKKTPVTLEVIEKAIKNQQDDLYELKKDLKIFQT…
p1	10	251	hypothetical protein	No significant similarity found.						ttggttgtggctgtagacgtcgttgtagatgtggctattcgaactataacaacaattacggtcgttgtgatagttatggtaacaactataatagtggttatgatggatctaattatggcggaggccagggtcatggtaataataattgtagagatggctataacaataataaaaaccatggttgcagttgtaatgatcatagttcttcaaaatattaattttatagatgggaaggcttgttcatataattga	MVVAVDVVVDVAIRTITTITVVVIVMVTTIIVVMMDLIMAEARVMVIIIVEMAITIIKTMVAVVMIIVLQNINFIDGKACSYN
p1	11	227	FIG01253263: hypothetical protein	Spore germination protein gerPA/gerPF [Bacillus subtilis]	80.1	0.98	2e-17	0.54	CUB47908.1	atgccatgcaatattaatgttcaaaactttaatgctaatggagttacagaaaacgcaaacttagatataggtaacaacgttcaaaatagtcatactgctaattcaaaatcagtaggggcctgtttttcttttggaaatacatcaccttcagtagcacatatgttaaataataattgtgatcctgatattagtgatcaaggccaagttgacaacacttcaaccacttaa	MPCNINVQNFNANGVTENANLDIGNNVQNSHTANSKSVGACFSFGNTSPSVAHMLNNNCDPDISDQGQVDNTSTT
p1	12	242	FIG01253263: hypothetical protein	Spore germination protein gerPA/gerPF [Bacillus subtilis]	68.6	0.93	5e-13	0.48	CUB47908.1	atgccttattctattattgttggtaatgtattgactaatgggattactcaaaacggaaatctagattttggtcatacagtacacaatagtcatacagctaattcaaaatgggtaggagcttgtatttctatgggtaatttctctccttctacgtcttggatggctaacggaaactttgatccagatattagtgaccaagatcaaattgcgaacccttctatgccaatatcggggcaactttaa	MPYSIIVGNVLTNGITQNGNLDFGHTVHNSHTANSKWVGACISMGNFSPSTSWMANGNFDPDISDQDQIANPSMPISGQL
p1	13	227	hypothetical protein	hypothetical protein BcerKBAB4_5366 [Bacillus weihenstephanensis KBAB4]	80.1	0.77	1e-17	0.66	ABY46722.1	atgccaggacgtcgtagtggagaccgtcgtacatctcgttctagattagatggttttcgaagaggagatgaaattcaagttttttctgctggaagacaacttgatgggaacggcacatttattagagtagaagatggctttttagtgtgggaagataattctggaaatagaaatgctactagtttagaaagcattagtgttcgtagggtacgaagacgttattgttaa	MPGRRSGDRRTSRSRLDGFRRGDEIQVFSAGRQLDGNGTFIRVEDGFLVWEDNSGNRNATSLESISVRRVRRRYC
p1	14	119	hypothetical protein	putative membrane protein [Bacillus methanolicus MGA3]	37	0.69	0.073	0.74	AIE61757.1	atgtctaattgtggtggatatggatttggtggaggttttgctcttctaattgtcctgtttattcttcttgtcattattggatgtagttgttttggtggcggctacggaggctactgctaa	MSNCGGYGFGGGFALLIVLFILLVIIGCSCFGGGYGGYC
p1	15	173	hypothetical protein	sporulation protein YjcZ [Bacillus pseudalcaliphilus]	39.3	0.85	0.019	0.61	WP_047987721.1	atgggcttctttggaggttacggtggctgtggttatggcggcggttacggctatggtggcggcggctgtggtggtggcggctgtggtggtggctttgccttaatcattgtactattcattttattaatcattattggtgcttcttgctttggcggtggttttggtggttgctaa	MGFFGGYGGCGYGGGYGYGGGGCGGGGCGGGFALIIVLFILLIIIGASCFGGGFGGC
p1	16	179	hypothetical protein	No significant similarity found.						gtgtctcctgataaacagggacacctttttgtattctatataaaactaattgtcagcaatttaaaaaatgagaaaagatatgagagtactgatcctgaaaagatgatcgctgtgaggcagctttattatagcctattgaagctctttgaaaaccctatttatttagggattctagaatga	MSPDKQGHLFVFYIKLIVSNLKNEKRYESTDPEKMIAVRQLYYSLLKLFENPIYLGILE
p1	17	269	hypothetical protein	hypothetical protein [Bacillus cereus]	70.1	0.73	6e-12	0.58	WP_044796597.1	atgccaatcgtattaatttatggaggtgccattgacggttcaatgaaatcaattattagtggtattaatccaagtgttggttcgttatatgatcgtttacaagttgcacaatttgataatatttttaacgttttacctttgtatggtgtctctgctcttcgagatgtggtcacaacaagtggtaatggaagtgtaaccaataatggtgatggttatgttttaactactacttcggcaaacgattctgcttccttcttccccgacaggtaa	MPIVLIYGGAIDGSMKSIISGINPSVGSLYDRLQVAQFDNIFNVLPLYGVSALRDVVTTSGNGSVTNNGDGYVLTTTSANDSASFFPDR
p1	18	701	hypothetical protein	hypothetical protein [Bacillus cereus]	220	1	1e-65	0.48	WP_044796597.1	atgtaccaaatcagatttggaagcaattttggtatcgtcgaatatcgggtagttatggttgatccaactactaacctagaaatgccaatcgcatgtcaccggcaatctactgtatcacaacctatcgtgggagattctaatcaaccagtccgtgtccaaatccaaaataattctaccggacaatcatttactgctaatgtaagaggaaggtattatgctaacttaggtacagcaagacctttaaatcgtatgacgtcagagcgtaggttaagtgtttccactaacaatactacctttgttccactggttagttttcaaaggaaagcgacatttccttcaggctcatccaaaaataattctataaatgtaaccgttaatggttttgatcttattacttca…	MYQIRFGSNFGIVEYRVVMVDPTTNLEMPIACHRQSTVSQPIVGDSNQPVRVQIQNNSTGQSFTANVRGRYYANLGTARPLNRMTSERRLSVSTNNTTFVPLVSFQRKATFPSGSSKNNSINVTVNGFDLITSADISWQLRQGSTLTGANWVNPSETLANETCCFADTSATAVNVSTGVKIMGGLAAAGTRAALTSFPVDIVMTGETPVTLCARNITSNTGTVSAVLRVHEEW
p1	19	284	hypothetical protein	Tat pathway signal sequence domain protein [Aneurinibacillus aneurinilyticus]	138	0.98	1e-39	0.75	WP_021624696.1	atgcctattattaaaccttttatggcctcaagaaagtttactgccacaattggggatggtacaggtactggtgctacatttgcaattgcagcaacaacttttcttgacgatactggtgcggctgccacagcgttcccagcttcatttgcgtattatgttttatatataaatgcgcagcctcaaacagctgatacttcaactcttactactactactattactattccagatggcgacgtactcgatcctgcgactccaatcctcgttgaagttgtagtcaactag	MPIIKPFMASRKFTATIGDGTGTGATFAIAATTFLDDTGAAATAFPASFAYYVLYINAQPQTADTSTLTTTTITIPDGDVLDPATPILVEVVVN
p1	20	557	Phage tail fiber protein	exonuclease RdgC [Bacillus cereus]	125	0.67	2e-30	0.56	WP_044810376.1	gtgaaatgtcaactttctcattataaaaaagtctgttgtaagaaaaagaagaataaaactcgttattataagaaaatatatcctcgatgtccttctttaacagtagtatctcttcctcaagttacttgttcttgttgtaatttccgaccttgctgctgttcaagcgagggaccagagggtccgcaaggtcctagaggaccaaaaggaccgcctggcccccaaggccccagaggtccagaaggaccgcctggcccccaaggccccagaggtccagaaggaccgcctggaccaccacttccagggccaatagcaaccactagcttattatatgttacttcttcagatggagaaaaacttgagtatacagacagtgatgcttccccgaattcggaaacaaac…	MKCQLSHYKKVCCKKKKNKTRYYKKIYPRCPSLTVVSLPQVTCSCCNFRPCCCSSEGPEGPQGPRGPKGPPGPQGPRGPEGPPGPQGPRGPEGPPGPPLPGPIATTSLLYVTSSDGEKLEYTDSDASPNSETNEILSPSEVSYINLFINGMIQPQSNYTVEKGKLVLNEPLEETTPIVLQFIIIN
p1	21	479	Phage capsid and scaffold	Firmicute plasmid replication protein (RepL) [Chlamydia trachomatis]	75.9	0.8	7e-14	0.31	CRH77748.1	atgatagaggtgggtaatgtggctaaaatatcaaaagtagaaacaaccaaagtcgtggatatgaatggggaaataacagaagaaactacaagtgtctcttttaattatggaaaagaaccagactacataaaagtatatctagacaatattgtcgttttagcagagatacaaggatggataagtaaagtcctatatgaacttattaaaggtgtaacctacgcaaataagggacagttcatcatcattaattcaggatataaaagaattgtagctgaaaatttaggaattaaacagcaatcagtaaccaatgcagttaatcagttaacgaagaaaaatatcttaattaaaaaggagaccggcgttttcttattaaatcctcaattcttcggtagaggtgaa…	MIEVGNVAKISKVETTKVVDMNGEITEETTSVSFNYGKEPDYIKVYLDNIVVLAEIQGWISKVLYELIKGVTYANKGQFIIINSGYKRIVAENLGIKQQSVTNAVNQLTKKNILIKKETGVFLLNPQFFGRGEWKDISKIRYEVELSADGKVMRLKDTN
p1	22	524	hypothetical protein	MerR family transcriptional regulator [Bacillus thuringiensis]	82.8	0.99	3e-16	0.35	WP_001158047.1	gtggcagccgaccttgaagttactacgtcaactctaagacgctggtctattgagttagaaaaagccggatataaattcgaaagaaatgaaaaagatcaaagaatttactatgaacgcgattttaaagcgttcagagaactaaagaaattaataaataataacgttgtactaatagacgctataaatgctgtagtatcaatggatgtagagagtctaaacgcatcccaaacgcctagcgtttatcgggaggaaacgcgtttaacgaggcaatttttagaagaaattttagacgaaaaaataaataaagcaatgcaacaagcctttgaagaaggccgccaacaaggccaaaaagaaattaaagaaatgataaagaaaatagaaaaaagatctgaagaacga…	MAADLEVTTSTLRRWSIELEKAGYKFERNEKDQRIYYERDFKAFRELKKLINNNVVLIDAINAVVSMDVESLNASQTPSVYREETRLTRQFLEEILDEKINKAMQQAFEEGRQQGQKEIKEMIKKIEKRSEERDDNLMSVIRSIQEEKEEVKQLIAASQEQEKKTFWQRLFSRI
p1	23	677	hypothetical protein	Rep protein [Bacillus flexus]	368	0.99	7e-126	0.79	WP_050691715.1	atgaaaagtgtaagaacggctttaaacgaagctgaaaagaaagctagattgaaggattttgagaaagatttaacagtcagaacagaagctgaggaaataaaaaaatctttgttaaataagttgactgaacttactggagaaaagcactacattggtaaagaaaaagatccttttgcaggggagccgtttaatcaagttatgcatagaaacctagatttgttgatacggattaattatttaactcaagctgaggaaagcactttatttcgacttcaagcttatttagaatttaaaagtaatataattatctgtagagaagataaattcaaaaagaaaaaaaagtatgatgatgaagatgactttgagctacctaaggcagcaacagtttcagatattgct…	MKSVRTALNEAEKKARLKDFEKDLTVRTEAEEIKKSLLNKLTELTGEKHYIGKEKDPFAGEPFNQVMHRNLDLLIRINYLTQAEESTLFRLQAYLEFKSNIIICREDKFKKKKKYDDEDDFELPKAATVSDIAEMIGKSRTQTSLILNSLKEKEILLNPEGAGQIEENGRTVSPRVWIVNPYIMICAPRKNEVKLDKLTMRLFKHSLKNLKDQDGKKVKLPVRFF
p1	24	413	hypothetical protein	hypothetical protein BMWSH_p205 [Bacillus megaterium WSH-002]	257	1	3e-85	0.91	AEN92138.1	atgaaatgtttatattgtgattcagaaaataattctacggatcaagcatgttcagtttgtggagcacctttacatacaaagcgtcctcaacttaaagaatatgtgagtctacaagattcagctttatcattcgaagatcttcaacgttttcatacgtatgacttgttagtattgcttcgtttggttcgagaagagcgttcaaaaagctataatttgatgagaacggttcagaaggctccagaaggagttgagattgataaaagtgtaatagagttcggagaaagcgaatatcgcctttatacagctcgtatgaagctcatagagggtcttttagtagaccggatggggtacaagcctaaacgagtggatgataagctgcttgcagcgttaaaacaccga…	MKCLYCDSENNSTDQACSVCGAPLHTKRPQLKEYVSLQDSALSFEDLQRFHTYDLLVLLRLVREERSKSYNLMRTVQKAPEGVEIDKSVIEFGESEYRLYTARMKLIEGLLVDRMGYKPKRVDDKLLAALKHRIESK
p1	25	308	hypothetical protein	hypothetical protein [Bacillus flexus]	190	1	1e-59	0.98	WP_050691717.1	gtgccaaagaagcgaacggatgaggaaattcttcaggagttagaagagaaaattgagaagatgaaagcgaagaaacaacaagttgaggcgcgtaaaaaagaaaaagaaagaaaagagagaacaagacgattgattcaagtcggcgcgattttcgagaaatactttgaaattcaaagtgaagaagaagcagaaaagattgccaaggcgttgcaatcttatgtaggtaaaaataaagataagattttgcatcacgatgtggttgtaaaagaaaaaaagaaagcagcagctgaaatagctgtttctgaatag	MPKKRTDEEILQELEEKIEKMKAKKQQVEARKKEKERKERTRRLIQVGAIFEKYFEIQSEEEAEKIAKALQSYVGKNKDKILHHDVVVKEKKKAAAEIAVSE
p1	26	1982	Conjugal transfer protein TraA	molybdopterin-guanine dinucleotide biosynthesis protein MobA [Bacillus sp. 171095_106]	1173	0.99	0	0.85	WP_028410414.1	atggctatctaccatctatcgatgcaaatcatcagtcgttcaaaaggacaatcagctgtcgctgcagctgcttatcgcagtggcgaaaaactacatgatgaacgtacagacgagcaaaagttttatggtcgtaatgtacaaccggaaaccatgattctgactcctaccaatgcgccagaatggatgaaagatcgtaatcgtttgtggaatgaagttgaaaaagtcgaaaaacgcaaagactcacagttagcacgagaattaaacattgcgttaccaattgaactaaaccacgatcaacaaaaagaactgattcaatcctttgctcaaaacgagtttgttcaaaaagggatggttgctgatattgctattcatcgtgatgacactaataatcctcatgcc…	MAIYHLSMQIISRSKGQSAVAAAAYRSGEKLHDERTDEQKFYGRNVQPETMILTPTNAPEWMKDRNRLWNEVEKVEKRKDSQLARELNIALPIELNHDQQKELIQSFAQNEFVQKGMVADIAIHRDDTNNPHAHIMLTMRNLDENGFGKKNRDWNADFANAKENNRGYVKNSEGCLSIREQWANYANKALEQAKSKERITHLSHENRGLEVLPTIHLGHVAHDMEKKGKKSKRGEINRERQEYNQAVIDLQAYRRQKEAHVKKMKEKEKQFSFSTDIEKTYIQKAASILNQKVISLDDISKRQEELRKMSDRHDPIERHFHVQQQQYLNVSNYYDRVRDLSREIKQNEEKVEELKGSLNPFKLKENNMMKRRHLDKISDLESNKLSYENNIKTYKESLR…
p1	27	251	hypothetical protein	No significant similarity found.						ttggttgtggctgtagacgtcgttgtagatgtggctattcgaactataacaacaattacggtcgttgtgatagttatggtaacaactataatagtggttatgatggatctaattatggcggaggccagggtcatggtaataataattgtagagatggctataacaataataaaaaccatggttgcagttgtaatgatcatagttcttcaaaatattaattttatagatgggaaggcttgttcatataattga	MVVAVDVVVDVAIRTITTITVVVIVMVTTIIVVMMDLIMAEARVMVIIIVEMAITIIKTMVAVVMIIVLQNINFIDGKACSYN
p1	28	227	FIG01253263: hypothetical protein	Spore germination protein gerPA/gerPF [Bacillus subtilis]	80.1	0.98	2e-17	0.54	CUB47908.1	atgccatgcaatattaatgttcaaaactttaatgctaatggagttacagaaaacgcaaacttagatataggtaacaacgttcaaaatagtcatactgctaattcaaaatcagtaggggcctgtttttcttttggaaatacatcaccttcagtagcacatatgttaaataataattgtgatcctgatattagtgatcaaggccaagttgacaacacttcaaccacttaa	MPCNINVQNFNANGVTENANLDIGNNVQNSHTANSKSVGACFSFGNTSPSVAHMLNNNCDPDISDQGQVDNTSTT
p1	29	242	FIG01253263: hypothetical protein	Spore germination protein gerPA/gerPF [Bacillus subtilis]	68.6	0.93	5e-13	0.48	CUB47908.1	atgccttattctattattgttggtaatgtattgactaatgggattactcaaaacggaaatctagattttggtcatacagtacacaatagtcatacagctaattcaaaatgggtaggagcttgtatttctatgggtaatttctctccttctacgtcttggatggctaacggaaactttgatccagatattagtgaccaagatcaaattgcgaacccttctatgccaatatcggggcaactttaa	MPYSIIVGNVLTNGITQNGNLDFGHTVHNSHTANSKWVGACISMGNFSPSTSWMANGNFDPDISDQDQIANPSMPISGQL
p1	30	227	hypothetical protein	hypothetical protein BMQ_pBM60004 [Bacillus megaterium QM B1551]	76.6	0.89	6e-16	0.57	ADE72437.1	atgccaggacgtcgtagtggagaccgtcgtacatctcgttctagattagatggttttcgaagaggagatgaaattcaagttttttctgctggaagacaacttgatgggaacggcacatttattagagtagaagatggctttttagtgtgggaagataattctggaaatagaaatgctactagtttagaaagcattagtgttcgtagggtacgaagacgttattgttaa	MPGRRSGDRRTSRSRLDGFRRGDEIQVFSAGRQLDGNGTFIRVEDGFLVWEDNSGNRNATSLESISVRRVRRRYC
p1	31	119	hypothetical protein	luciferase [Bacillus megaterium]	35.8	0.53	0.17	0.9	WP_047934079.1	atgtctaattgtggtggatatggatttggtggaggttttgctcttctaattgtcctgtttattcttcttgtcattattggatgtagttgttttggtggcggctacggaggctactgctaa	MSNCGGYGFGGGFALLIVLFILLVIIGCSCFGGGYGGYC
p1	32	173	hypothetical protein	sporulation protein YjcZ [Bacillus pseudalcaliphilus]	39.3	0.85	0.019	0.61	WP_047987721.1	atgggcttctttggaggttacggtggctgtggttatggcggcggttacggctatggtggcggcggctgtggtggtggcggctgtggtggtggctttgccttaatcattgtactattcattttattaatcattattggtgcttcttgctttggcggtggttttggtggttgctaa	MGFFGGYGGCGYGGGYGYGGGGCGGGGCGGGFALIIVLFILLIIIGASCFGGGFGGC
p1	33	179	hypothetical protein	No significant similarity found.						gtgtctcctgataaacagggacacctttttgtattctatataaaactaattgtcagcaatttaaaaaatgagaaaagatatgagagtactgatcctgaaaagatgatcgctgtgaggcagctttattatagcctattgaagctctttgaaaaccctatttatttagggattctagaatga	MSPDKQGHLFVFYIKLIVSNLKNEKRYESTDPEKMIAVRQLYYSLLKLFENPIYLGILE
p1	34	269	hypothetical protein	hypothetical protein [Bacillus cereus]	70.1	0.73	6e-12	0.58	WP_044796597.1	atgccaatcgtattaatttatggaggtgccattgacggttcaatgaaatcaattattagtggtattaatccaagtgttggttcgttatatgatcgtttacaagttgcacaatttgataatatttttaacgttttacctttgtatggtgtctctgctcttcgagatgtggtcacaacaagtggtaatggaagtgtaaccaataatggtgatggttatgttttaactactacttcggcaaacgattctgcttccttcttccccgacaggtaa	MPIVLIYGGAIDGSMKSIISGINPSVGSLYDRLQVAQFDNIFNVLPLYGVSALRDVVTTSGNGSVTNNGDGYVLTTTSANDSASFFPDR
p1	35	284	hypothetical protein	hypothetical protein [Bacillus cereus]	84.7	0.97	3e-17	0.49	WP_044796597.1	atgtaccaaatcagatttggaagcaattttggtatcgtcgaatatcgggtagttatggttgatccaactactaacctagaaatgccaatcgcatgtcaccggcaatctactgtatcacaacctatcgtgggagattctaatcaaccagtccgtgtccaaatccaaaataattctaccggacaatcatttactgctaatgtaagaggaaggtattatgctaacttaggtacagcaagacctttaaatcgtatgacgtcagagcgtaggtttaagtgtttccactaa	MYQIRFGSNFGIVEYRVVMVDPTTNLEMPIACHRQSTVSQPIVGDSNQPVRVQIQNNSTGQSFTANVRGRYYANLGTARPLNRMTSERRFKCFH
p2	1	248	hypothetical protein	hypothetical protein [Aneurinibacillus migulanus]	35	0.47	4.3	0.49	WP_043064948.1	atgggattagaagaaaagttaatactaggggaattgctagtcaatgtaaccattgttcctcttactggtgttctatcacaagttacggtcccactaattaagcctgaacattgtattgttggagaaactattagtgtgattcttggtgtacatggaaaaggttcgggagggcaaatagaagatgaatcctcctcgcattcacaacagtcacagtcacaattacaacaatcagattcttcttcttcgtaa	MGLEEKLILGELLVNVTIVPLTGVLSQVTVPLIKPEHCIVGETISVILGVHGKGSGGQIEDESSSHSQQSQSQLQQSDSSSS
p2	2	1103	FIG00675607: hypothetical protein	Protein containing gellan lyase domain [Bacillus smithii]	461	0.83	3e-157	0.75	AKP46590.1	ttgactagcaattcccctagtattaacttttcttctaatcccattattacagactccaatggtactttcacaactgtattaaatgtaacccctcgtactatttctactcttgtaactataactgcattaacttccgtaaatggtgaacttatttcaacatcagtaactactaccgtttcatgtccatcattagaagctgtaaacgcagcacaaaatatagccgaaatgcgagctgctattgaagatcctcaacttggactagatctcacagcatacaataaccttacagatgcacaaaaaaatcaagtagccaatacagtattaatgaatagaccgccatcaggatatcctactgtagctagtgtacaaatagcacttaataatgcaattgactccatt…	MTSNSPSINFSSNPIITDSNGTFTTVLNVTPRTISTLVTITALTSVNGELISTSVTTTVSCPSLEAVNAAQNIAEMRAAIEDPQLGLDLTAYNNLTDAQKNQVANTVLMNRPPSGYPTVASVQIALNNAIDSIVDPNNVFVRAGSVGGNGSRANPFGTIQEGITAVNIGGTVHILEGTYPITTQINVNKSDITLLGENDPLLLLEADLIPILITASGVTIDDLTITSDIPYAKEFIQVGANNVSLLNNTIYGPSQVLPMSNWVVNRAVVSQVGISNILLEGNTFYSLRTGMYINPNTTGAINNNVVYNTKGGFLVDRAFTTFLGNSWGIPPNEFDIVLLAGTTMGPPYNNIPALKAANNNATISDQR
p2	3	167	hypothetical protein	sporulation protein [Bacillus aryabhattai]	100	1	4e-26	0.95	WP_053001458.1	ttggagtctcataaagtgattttaaaagaagctttaaccgttgagattgaaaaagagagaaaatttttgatagaaacggcatttaaagagggttttacaagtaacaacacggtagagattagtcaatttattgatgatatgttaaatgaattagaaaagattaaatag	MESHKVILKEALTVEIEKERKFLIETAFKEGFTSNNTVEISQFIDDMLNELEKIK
p2	4	1418	Plasmid recombination enzyme	plasmid recombination enzyme [Bacillus megaterium]	892	1	0	0.92	KLV28632.1	atggccaaatatgggattatccgcatgcaaaagtttcacaaagacgcaatattggggatccagaaacacaaccaacgagaaggcgagaacagtaaaaataaagacatcgattcaaccagaacgatgctcaactatgattttgtaaacgaggacaaaattaagtaccatgaagaaattaagaagatgacggccacccgtgtgaaacgaaaaattcggaatgatgcggtcctggtggcagaattctttgtgtcagccagtccggagtatatgcatgcgatgtcgccagacgagcagcgtaaatattttgaagcatcactggatcatattgctggcaagtatggccagcataacattttatatgctgtggtacataacgatgaagccacgccacatatgcat…	MAKYGIIRMQKFHKDAILGIQKHNQREGENSKNKDIDSTRTMLNYDFVNEDKIKYHEEIKKMTATRVKRKIRNDAVLVAEFFVSASPEYMHAMSPDEQRKYFEASLDHIAGKYGQHNILYAVVHNDEATPHMHVGFVPITDDRRLAAKEYFHGKTKIRRIQDDFHNYMNKRGYDIERGEPSELQHKSVHEFKKQEREKELKHLQQLVAHKEKELQGMDNLLELKTAPPVEIRSERRIEELCSQPLEVEAAKSVMSSKVKVEEADFHELMSLTKELQQTLAAEHERTHALSHEVDRYEKENKALKHDLSETKQELEIYVAHQDGEVEKAKKQMRQKLVRDFSAEQKENVKDEVKRELDTQYKAHISSLSDDLMIEKQKREKTKKELVQANKLNDSLTEMN…
p2	5	521	hypothetical protein	hypothetical protein [Bacillus aryabhattai]	266	1	1e-87	0.87	WP_053074102.1	atgaaaaaatctagattgattttaatgatgatggttctgctttcttggtcaagtcttcttttcttaggacgtcgtgattttaaaaaatatcttccagctgctctattcattggggctgtgaccaaaataacaaataaaattgcaaaaaaaagaaagtggtggcgctttgaggaaagtatccatcctaagattagtggagatgatacatgggcttggggattgttctttccttctacactttggatcttgaagctttctttcgggaaaatatggtcatatgttacgtataaccttatactacacacgtcttttgtgtatttattgttatcatttttaaagaagttaaagattgtttcacttgtgaagttgagcaaaaggcagtatttattagtcttgttc…	MKKSRLILMMMVLLSWSSLLFLGRRDFKKYLPAALFIGAVTKITNKIAKKRKWWRFEESIHPKISGDDTWAWGLFFPSTLWILKLSFGKIWSYVTYNLILHTSFVYLLLSFLKKLKIVSLVKLSKRQYLLVLFCREILLYLFQFSKEYIERKKPHSVSVNGKSQDRQVENLRS
p2	6	416	rifampin ADP-ribosyl transferase	ribosomal subunit interface protein [Bacillus subtilis]	281	1	2e-94	0.99	WP_003220022.1	atgaatgacaagaaaaatgtcttagatcctggtccgttttttcatggtactaaagcagaactgaagattggagacctgcttgaaccattgtacttatccaattatcaggataaaaaatctaaccatatctattttactggaacattaaacgctgctaaatggggtgctgaattagcaagatctaattcaaaagagagaatttatgttgtagaaccattaggcgattttgaaaatgatccaaatttaactgacaaaaagtttcctggaaatccaacacgttcttatagatctaaatctcctttgaaaatagtggctgaattaggttcatgggaaagacactctgatgaagaaataaatcatatgcttatgtctttaaaaaagttaagtgaagaaggaaaa…	MNDKKNVLDPGPFFHGTKAELKIGDLLEPLYLSNYQDKKSNHIYFTGTLNAAKWGAELARSNSKERIYVVEPLGDFENDPNLTDKKFPGNPTRSYRSKSPLKIVAELGSWERHSDEEINHMLMSLKKLSEEGKNVIYD
p2	7	539	hypothetical protein	MerR HTH family regulatory protein [Brevibacillus laterosporus LMG 15441]	112	0.95	3e-27	0.35	AIG28967.1	atgtcaggtgacacaaggaagcagcaaaaggtttatacagcaagggaagtcgctacccttttagcgatacagaacactactgttcgtaagtattctcagctgcttgaaaaagcagggtaccatatccataaaaatgagttgggccacagaggtttctttgataaggatgtaattgttttacgtaagattagagagttgataaagcaccctgatatgtcactggatcaggctataaatgcagtgatatcaacggttggcgaagacgatgtgtcagaccgtgacacagaggaattagtgacatatcaggggacacaacagtatgagcagttactaaaacaatttgaagactttaaagaagaacaaatgaaatttaatcaagaactattgaaacagatccaa…	MSGDTRKQQKVYTAREVATLLAIQNTTVRKYSQLLEKAGYHIHKNELGHRGFFDKDVIVLRKIRELIKHPDMSLDQAINAVISTVGEDDVSDRDTEELVTYQGTQQYEQLLKQFEDFKEEQMKFNQELLKQIQQRDEYISKRLENRDRELLDAVKGIQETQKFIAASEEKKKKWWEFWK
p2	8	578	hypothetical protein	replication protein MZFP585 [Bacillus cereus]	251	0.97	3e-81	0.64	ACR78189.1	atgcagaaagcattacaagaagccgaaaaaaaagctagattacgagaaattgaaaacggtaaagttctaactgaagaagaattaaattatgcgaacgaacttcaagccaaagctaattcaaagggaatgaaattggttccagaaagaaaaattaagaataaagtgaggtttgtacagttgattcaagaaaatattttatatttaagagatataaaatacttaaccactgctgagaaaaactttttaatggatctagttcctaatgttgaattttcttctaactgtatagttaatgattctagacaggttaattcacttcctgttactcaaagtgaccttgcagagatattaggaaaaaagaaacaaaatataaatcccattataaaagggttaatagat…	MQKALQEAEKKARLREIENGKVLTEEELNYANELQAKANSKGMKLVPERKIKNKVRFVQLIQENILYLRDIKYLTTAEKNFLMDLVPNVEFSSNCIVNDSRQVNSLPVTQSDLAEILGKKKQNINPIIKGLIDKGILARSESGVEDNNVRAYALFINPHIMFSGDKDNVNGTLKAMFRKTPKELKSLPVKLF
p2	9	512	hypothetical protein	LP1G.22 [Lysinibacillus sphaericus]	91.7	0.98	9e-20	0.34	WP_011154348.1	atgatgctggtaaaaaagatgttaaatggaattatgatgaaagaaatcactattaaagaattagctgatcgatatgatgtaagtactcgtaccattcaatcaaagattaagaaattaggttatgaatgggacagtaaggaaagtatttatcgctatgttggagaagaatcagaacctgtagatgttgatttcagtacccttatttctaaaaacagtaaaatgctagcagaacaaaagctagctaatagccaagtagcagctagtattagctatttaaatgaaagtgaaagcactagtgctagttcttcaaaagctagtacaactactagcaaagtagatgcaattgatatcttgctgcagaattcgaaggatcgctctaaaagagtatatagaggattc…	MMLVKKMLNGIMMKEITIKELADRYDVSTRTIQSKIKKLGYEWDSKESIYRYVGEESEPVDVDFSTLISKNSKMLAEQKLANSQVAASISYLNESESTSASSSKASTTTSKVDAIDILLQNSKDRSKRVYRGFYFDDDVLSIIDQVPKSYKSELVNEALRKVFKEKGLLD
p2	10	542	hypothetical protein	hypothetical protein [Bacillus subtilis]	172	0.97	3e-50	0.54	WP_032732005.1	atggttaatagtaaaattaaaaaagcattagttgggtctttaatgtcagctgttacttttacagttttaattacaccgaatcaagctagtgcagctgaaaaacctattcttcatcaagacaaaacttctgtgaacacgcaaacaaatgacatacatgcatcatttgtcaacgactaccgtaacgtaaaaaagaatgtaaaaaaatctacaagttggtctagttacaaaagagtttcagataatatagctactggatctaaaggcggtagcatttctgcaactaaaagtgtaactttcaatcctagtgtaaaaggtaacatatccggtttggatattaatgtaggtggttctataagtagcacggtaggttatacattaaatgccggtgctaataaaaga…	MVNSKIKKALVGSLMSAVTFTVLITPNQASAAEKPILHQDKTSVNTQTNDIHASFVNDYRNVKKNVKKSTSWSSYKRVSDNIATGSKGGSISATKSVTFNPSVKGNISGLDINVGGSISSTVGYTLNAGANKRVYMAYRVKYNVETGVNHRVDIVTGKTVSKSNYTVKKPMYGEYKLINY
p2	11	206	hypothetical protein	ribonuclease BN [Bacillus subtilis]	70.5	0.86	6e-14	0.56	KJJ40563.1	atgcaaaacaaatctattttagcttatgtcctaatacttttaacatttatagtaccagtttatttattcattaactcaaaagttttaatacctaaagggtatgaattagctattgacggctatttaatatctagaactttaatctttatctttattttgtacttattatctaaatttggatattttcttttaaataaaaaagattag	MQNKSILAYVLILLTFIVPVYLFINSKVLIPKGYELAIDGYLISRTLIFIFILYLLSKFGYFLLNKKD
p2	12	248	hypothetical protein	hypothetical protein [Aneurinibacillus migulanus]	35	0.47	4.3	0.49	WP_043064948.1	atgggattagaagaaaagttaatactaggggaattgctagtcaatgtaaccattgttcctcttactggtgttctatcacaagttacggtcccactaattaagcctgaacattgtattgttggagaaactattagtgtgattcttggtgtacatggaaaaggttcgggagggcaaatagaagatgaatcctcctcgcattcacaacagtcacagtcacaattacaacaatcagattcttcttcttcgtaa	MGLEEKLILGELLVNVTIVPLTGVLSQVTVPLIKPEHCIVGETISVILGVHGKGSGGQIEDESSSHSQQSQSQLQQSDSSSS
p2	13	1103	FIG00675607: hypothetical protein	Protein containing gellan lyase domain [Bacillus smithii]	461	0.83	3e-157	0.75	AKP46590.1	ttgactagcaattcccctagtattaacttttcttctaatcccattattacagactccaatggtactttcacaactgtattaaatgtaacccctcgtactatttctactcttgtaactataactgcattaacttccgtaaatggtgaacttatttcaacatcagtaactactaccgtttcatgtccatcattagaagctgtaaacgcagcacaaaatatagccgaaatgcgagctgctattgaagatcctcaacttggactagatctcacagcatacaataaccttacagatgcacaaaaaaatcaagtagccaatacagtattaatgaatagaccgccatcaggatatcctactgtagctagtgtacaaatagcacttaataatgcaattgactccatt…	MTSNSPSINFSSNPIITDSNGTFTTVLNVTPRTISTLVTITALTSVNGELISTSVTTTVSCPSLEAVNAAQNIAEMRAAIEDPQLGLDLTAYNNLTDAQKNQVANTVLMNRPPSGYPTVASVQIALNNAIDSIVDPNNVFVRAGSVGGNGSRANPFGTIQEGITAVNIGGTVHILEGTYPITTQINVNKSDITLLGENDPLLLLEADLIPILITASGVTIDDLTITSDIPYAKEFIQVGANNVSLLNNTIYGPSQVLPMSNWVVNRAVVSQVGISNILLEGNTFYSLRTGMYINPNTTGAINNNVVYNTKGGFLVDRAFTTFLGNSWGIPPNEFDIVLLAGTTMGPPYNNIPALKAANNNATISDQR
p2	14	167	hypothetical protein	sporulation protein [Bacillus aryabhattai]	100	1	4e-26	0.95	WP_053001458.1	ttggagtctcataaagtgattttaaaagaagctttaaccgttgagattgaaaaagagagaaaatttttgatagaaacggcatttaaagagggttttacaagtaacaacacggtagagattagtcaatttattgatgatatgttaaatgaattagaaaagattaaatag	MESHKVILKEALTVEIEKERKFLIETAFKEGFTSNNTVEISQFIDDMLNELEKIK
p2	15	1418	hypothetical protein	plasmid recombination enzyme [Bacillus megaterium]	892	1	0	0.92	KLV28632.1	atggccaaatatgggattatccgcatgcaaaagtttcacaaagacgcaatattggggatccagaaacacaaccaacgagaaggcgagaacagtaaaaataaagacatcgattcaaccagaacgatgctcaactatgattttgtaaacgaggacaaaattaagtaccatgaagaaattaagaagatgacggccacccgtgtgaaacgaaaaattcggaatgatgcggtcctggtggcagaattctttgtgtcagccagtccggagtatatgcatgcgatgtcgccagacgagcagcgtaaatattttgaagcatcactggatcatattgctggcaagtatggccagcataacattttatatgctgtggtacataacgatgaagccacgccacatatgcat…	MAKYGIIRMQKFHKDAILGIQKHNQREGENSKNKDIDSTRTMLNYDFVNEDKIKYHEEIKKMTATRVKRKIRNDAVLVAEFFVSASPEYMHAMSPDEQRKYFEASLDHIAGKYGQHNILYAVVHNDEATPHMHVGFVPITDDRRLAAKEYFHGKTKIRRIQDDFHNYMNKRGYDIERGEPSELQHKSVHEFKKQEREKELKHLQQLVAHKEKELQGMDNLLELKTAPPVEIRSERRIEELCSQPLEVEAAKSVMSSKVKVEEADFHELMSLTKELQQTLAAEHERTHALSHEVDRYEKENKALKHDLSETKQELEIYVAHQDGEVEKAKKQMRQKLVRDFSAEQKENVKDEVKRELDTQYKAHISSLSDDLMIEKQKREKTKKELVQANKLNDSLTEMN…
p2	16	521	hypothetical protein	hypothetical protein [Bacillus aryabhattai]	266	1	1e-87	0.87	WP_053074102.1	atgaaaaaatctagattgattttaatgatgatggttctgctttcttggtcaagtcttcttttcttaggacgtcgtgattttaaaaaatatcttccagctgctctattcattggggctgtgaccaaaataacaaataaaattgcaaaaaaaagaaagtggtggcgctttgaggaaagtatccatcctaagattagtggagatgatacatgggcttggggattgttctttccttctacactttggatcttgaagctttctttcgggaaaatatggtcatatgttacgtataaccttatactacacacgtcttttgtgtatttattgttatcatttttaaagaagttaaagattgtttcacttgtgaagttgagcaaaaggcagtatttattagtcttgttc…	MKKSRLILMMMVLLSWSSLLFLGRRDFKKYLPAALFIGAVTKITNKIAKKRKWWRFEESIHPKISGDDTWAWGLFFPSTLWILKLSFGKIWSYVTYNLILHTSFVYLLLSFLKKLKIVSLVKLSKRQYLLVLFCREILLYLFQFSKEYIERKKPHSVSVNGKSQDRQVENLRS
p2	17	116	rifampin ADP-ribosyl transferase	ribosomal subunit interface protein [Bacillus aryabhattai]	76.3	1	4e-16	0.95	WP_045295607.1	ttgaaaatagtggctgaattaggttcatgggaaagacactctgatgaagaaataaatcatatgcttatgtctttaaaaaagttaagtgaagaaggaaaaaatgtaatatacgattga	MKIVAELGSWERHSDEEINHMLMSLKKLSEEGKNVIYD
p2	18	209	rifampin ADP-ribosyl transferase	ribosomal subunit interface protein [Bacillus subtilis]	135	1	3e-38	0.93	WP_003220022.1	atgaatgacaagaaaaatgtcttagatcctggtccgttttttcatggtactaaagcagaactgaagattggagacctgcttgaaccattgtacttatccaattatcaggataaaaaatctaaccatatctattttactggaacattaaacgctgctaaatggggtgctgaattagcaagatctaattcaaagagagaatttatgttgtag	MNDKKNVLDPGPFFHGTKAELKIGDLLEPLYLSNYQDKKSNHIYFTGTLNAAKWGAELARSNSKREFML
p2	19	539	hypothetical protein	MerR HTH family regulatory protein [Brevibacillus laterosporus LMG 15441]	112	0.95	3e-27	0.35	AIG28967.1	atgtcaggtgacacaaggaagcagcaaaaggtttatacagcaagggaagtcgctacccttttagcgatacagaacactactgttcgtaagtattctcagctgcttgaaaaagcagggtaccatatccataaaaatgagttgggccacagaggtttctttgataaggatgtaattgttttacgtaagattagagagttgataaagcaccctgatatgtcactggatcaggctataaatgcagtgatatcaacggttggcgaagacgatgtgtcagaccgtgacacagaggaattagtgacatatcaggggacacaacagtatgagcagttactaaaacaatttgaagactttaaagaagaacaaatgaaatttaatcaagaactattgaaacagatccaa…	MSGDTRKQQKVYTAREVATLLAIQNTTVRKYSQLLEKAGYHIHKNELGHRGFFDKDVIVLRKIRELIKHPDMSLDQAINAVISTVGEDDVSDRDTEELVTYQGTQQYEQLLKQFEDFKEEQMKFNQELLKQIQQRDEYISKRLENRDRELLDAVKGIQETQKFIAASEEKKKKWWEFWK
p3	1	125	hypothetical protein	sporulation protein [Bacillus aryabhattai]	70.9	0.92	1e-14	0.92	WP_053001458.1	ttgagattgaaaaagagaaaatttttgatagaaacggcatttaaagagggttttacaagtaacaacacggtagagattagtcaatttattgatgatatgttaaatgaattagaaaagattaaatag	MRLKKRKFLIETAFKEGFTSNNTVEISQFIDDMLNELEKIK
p3	2	116	hypothetical protein	hypothetical protein BMQ_pBM30013 [Bacillus megaterium QM B1551]	34.7	0.57	0.45	0.68	ADE72280.1	atgtttcatacttcgaatacgtatgaacaaacccttacaaaaaagcaacctcattcattggccaatgccgaggttgcttttttattgttttcaatagttctatttaatcttttctaa	MFHTSNTYEQTLTKKQPHSLANAEVAFLLFSIVLFNLF
p3	3	302	FIG00675607: hypothetical protein	Protein containing gellan lyase domain [Bacillus smithii]	164	1	3e-46	0.78	AKP46590.1	gtggtttcacaagtaggtatttctaatatactgttagaagggaatactttttattctcttagaacaggaatgtatataaacccaaatacaacaggagcaataaataataatgttgtctataatactaaaggtggctttttagtagatcgtgcttttacaactttccttggtaactcgtggggaattcctccaaatgagtttgatattgttttattagcaggtactacgatgggacctccatataacaatattcctgcattaaaagctgcaaacaataatgcaaccatttcagatcaaagatga	MVSQVGISNILLEGNTFYSLRTGMYINPNTTGAINNNVVYNTKGGFLVDRAFTTFLGNSWGIPPNEFDIVLLAGTTMGPPYNNIPALKAANNNATISDQR
p3	4	815	Flagellar hook-length control protein FliK	Protein containing gellan lyase domain [Bacillus smithii]	298	0.75	3e-95	0.74	AKP46590.1	ttgactagcaattcccctagtattaacttttcttctaatcccattattacagactccaatggtactttcacaactgtattaaatgtaacccctcgtactatttctactcttgtaactataactgcattaacttccgtaaatggtgaacttatttcaacatcagtaactactaccgtttcatgtccatcattagaagctgtaaacgcagcacaaaatatagccgaaatgcgagctgctattgaagatcctcaacttggactagatctcacagcatacaataaccttacagatgcacaaaaaaatcaagtagccaatacagtattaatgaatagaccgccatcaggatatcctactgtagctagtgtacaaatagcacttaataatgcaattgactccatt…	MTSNSPSINFSSNPIITDSNGTFTTVLNVTPRTISTLVTITALTSVNGELISTSVTTTVSCPSLEAVNAAQNIAEMRAAIEDPQLGLDLTAYNNLTDAQKNQVANTVLMNRPPSGYPTVASVQIALNNAIDSIVDPNNVFVRAGSVGGNGSRANPFGTIQEGITAVNIGGTVHILEGTYPITTQINVNKSDITLLGENDPLLLLEADLIPILITASGVTIDDLTITSDIPYAKEFIQVGANNVSLLNNTIYGPSQVLPMSNWVVNRAWFHK
p3	5	248	hypothetical protein	hypothetical protein [Aneurinibacillus migulanus]	35	0.47	4.3	0.49	WP_043064948.1	atgggattagaagaaaagttaatactaggggaattgctagtcaatgtaaccattgttcctcttactggtgttctatcacaagttacggtcccactaattaagcctgaacattgtattgttggagaaactattagtgtgattcttggtgtacatggaaaaggttcgggagggcaaatagaagatgaatcctcctcgcattcacaacagtcacagtcacaattacaacaatcagattcttcttcttcgtaa	MGLEEKLILGELLVNVTIVPLTGVLSQVTVPLIKPEHCIVGETISVILGVHGKGSGGQIEDESSSHSQQSQSQLQQSDSSSS
p3	6	212	hypothetical protein	ribonuclease BN [Bacillus subtilis]	70.5	0.84	6e-14	0.56	KJJ40563.1	atgttcatgcaaaacaaatctattttagcttatgtcctaatacttttaacatttatagtaccagtttatttattcattaactcaaaagttttaatacctaaagggtatgaattagctattgacggctatttaatatctagaactttaatctttatctttattttgtacttattatctaaatttggatattttcttttaaataaaaaagattag	MFMQNKSILAYVLILLTFIVPVYLFINSKVLIPKGYELAIDGYLISRTLIFIFILYLLSKFGYFLLNKKD
p3	7	542	hypothetical protein	hypothetical protein [Bacillus subtilis]	172	0.97	3e-50	0.54	WP_032732005.1	atggttaatagtaaaattaaaaaagcattagttgggtctttaatgtcagctgttacttttacagttttaattacaccgaatcaagctagtgcagctgaaaaacctattcttcatcaagacaaaacttctgtgaacacgcaaacaaatgacatacatgcatcatttgtcaacgactaccgtaacgtaaaaaagaatgtaaaaaaatctacaagttggtctagttacaaaagagtttcagataatatagctactggatctaaaggcggtagcatttctgcaactaaaagtgtaactttcaatcctagtgtaaaaggtaacatatccggtttggatattaatgtaggtggttctataagtagcacggtaggttatacattaaatgccggtgctaataaaaga…	MVNSKIKKALVGSLMSAVTFTVLITPNQASAAEKPILHQDKTSVNTQTNDIHASFVNDYRNVKKNVKKSTSWSSYKRVSDNIATGSKGGSISATKSVTFNPSVKGNISGLDINVGGSISSTVGYTLNAGANKRVYMAYRVKYNVETGVNHRVDIVTGKTVSKSNYTVKKPMYGEYKLINY
p3	8	524	hypothetical protein	LP1G.22 [Lysinibacillus sphaericus]	92	0.96	9e-20	0.34	WP_011154348.1	atgggggctagtatgatgctggtaaaaaagatgttaaatggaattatgatgaaagaaatcactattaaagaattagctgatcgatatgatgtaagtactcgtaccattcaatcaaagattaagaaattaggttatgaatgggacagtaaggaaagtatttatcgctatgttggagaagaatcagaacctgtagatgttgatttcagtacccttatttctaaaaacagtaaaatgctagcagaacaaaagctagctaatagccaagtagcagctagtattagctatttaaatgaaagtgaaagcactagtgctagttcttcaaaagctagtacaactactagcaaagtagatgcaattgatatcttgctgcagaattcgaaggatcgctctaaaagagta…	MGASMMLVKKMLNGIMMKEITIKELADRYDVSTRTIQSKIKKLGYEWDSKESIYRYVGEESEPVDVDFSTLISKNSKMLAEQKLANSQVAASISYLNESESTSASSSKASTTTSKVDAIDILLQNSKDRSKRVYRGFYFDDDVLSIIDQVPKSYKSELVNEALRKVFKEKGLLD
p3	9	635	hypothetical protein	replication protein MZFP585 [Bacillus cereus]	252	0.89	5e-81	0.64	ACR78189.1	atgtattctaacacaataaggttagttccttccactactaaatggaggaatttaaaaatgcagaaagcattacaagaagccgaaaaaaaagctagattacgagaaattgaaaacggtaaagttctaactgaagaagaattaaattatgcgaacgaacttcaagccaaagctaattcaaagggaatgaaattggttccagaaagaaaaattaagaataaagtgaggtttgtacagttgattcaagaaaatattttatatttaagagatataaaatacttaaccactgctgagaaaaactttttaatggatctagttcctaatgttgaattttcttctaactgtatagttaatgattctagacaggttaattcacttcctgttactcaaagtgaccttgca…	MYSNTIRLVPSTTKWRNLKMQKALQEAEKKARLREIENGKVLTEEELNYANELQAKANSKGMKLVPERKIKNKVRFVQLIQENILYLRDIKYLTTAEKNFLMDLVPNVEFSSNCIVNDSRQVNSLPVTQSDLAEILGKKKQNINPIIKGLIDKGILARSESGVEDNNVRAYALFINPHIMFSGDKDNVNGTLKAMFRKTPKELKSLPVKLF
p3	10	539	hypothetical protein	MerR HTH family regulatory protein [Brevibacillus laterosporus LMG 15441]	112	0.95	3e-27	0.35	AIG28967.1	atgtcaggtgacacaaggaagcagcaaaaggtttatacagcaagggaagtcgctacccttttagcgatacagaacactactgttcgtaagtattctcagctgcttgaaaaagcagggtaccatatccataaaaatgagttgggccacagaggtttctttgataaggatgtaattgttttacgtaagattagagagttgataaagcaccctgatatgtcactggatcaggctataaatgcagtgatatcaacggttggcgaagacgatgtgtcagaccgtgacacagaggaattagtgacatatcaggggacacaacagtatgagcagttactaaaacaatttgaagactttaaagaagaacaaatgaaatttaatcaagaactattgaaacagatccaa…	MSGDTRKQQKVYTAREVATLLAIQNTTVRKYSQLLEKAGYHIHKNELGHRGFFDKDVIVLRKIRELIKHPDMSLDQAINAVISTVGEDDVSDRDTEELVTYQGTQQYEQLLKQFEDFKEEQMKFNQELLKQIQQRDEYISKRLENRDRELLDAVKGIQETQKFIAASEEKKKKWWEFWK
p3	11	416	rifampin ADP-ribosyl transferase	ribosomal subunit interface protein [Bacillus subtilis]	281	1	2e-94	0.99	WP_003220022.1	atgaatgacaagaaaaatgtcttagatcctggtccgttttttcatggtactaaagcagaactgaagattggagacctgcttgaaccattgtacttatccaattatcaggataaaaaatctaaccatatctattttactggaacattaaacgctgctaaatggggtgctgaattagcaagatctaattcaaaagagagaatttatgttgtagaaccattaggcgattttgaaaatgatccaaatttaactgacaaaaagtttcctggaaatccaacacgttcttatagatctaaatctcctttgaaaatagtggctgaattaggttcatgggaaagacactctgatgaagaaataaatcatatgcttatgtctttaaaaaagttaagtgaagaaggaaaa…	MNDKKNVLDPGPFFHGTKAELKIGDLLEPLYLSNYQDKKSNHIYFTGTLNAAKWGAELARSNSKERIYVVEPLGDFENDPNLTDKKFPGNPTRSYRSKSPLKIVAELGSWERHSDEEINHMLMSLKKLSEEGKNVIYD
p3	12	497	hypothetical protein	hypothetical protein [Bacillus aryabhattai]	253	1	2e-82	0.86	WP_053074102.1	atgatgatggttctgctttcttggtcaagtcttcttttcttaggacgtcgtgattttaaaaaatatcttccagctgctctattcattggggctgtgaccaaaataacaaataaaattgcaaaaaaaagaaagtggtggcgctttgaggaaagtatccatcctaagattagtggagatgatacatgggcttggggattgttctttccttctacactttggatcttgaagctttctttcgggaaaatatggtcatatgttacgtataaccttatactacacacgtcttttgtgtatttattgttatcatttttaaagaagttaaagattgtttcacttgtgaagttgagcaaaaggcagtatttattagtcttgttctgtagagaaattcttttgtattta…	MMMVLLSWSSLLFLGRRDFKKYLPAALFIGAVTKITNKIAKKRKWWRFEESIHPKISGDDTWAWGLFFPSTLWILKLSFGKIWSYVTYNLILHTSFVYLLLSFLKKLKIVSLVKLSKRQYLLVLFCREILLYLFQFSKEYIERKKPHSVSVNGKSQDRQVENLRS
p3	13	239	hypothetical protein	hypothetical protein [Bacillus aryabhattai]	38.9	0.29	0.064	0.74	WP_052500268.1	ttgacgccaaccggcgagggagccccctcaaaggttgagggggttgggggtgtttgtagaagccattccaaaggggcttccctttggaaggtggtggacggcgtccacggtctttatgaaaaagggcatccgttgaggatgtcttttttcattttggcggagccaaacacagggaggaactccgaccgccacctcgtagagcgcgctcccaatttgatcgaagatgaaaaattggtgtag	MTPTGEGAPSKVEGVGGVCRSHSKGASLWKVVDGVHGLYEKGHPLRMSFFILAEPNTGRNSDRHLVERAPNLIEDEKLV
p4	1	1019	Putative surface protein	plasmid recombination enzyme [Bacillus aryabhattai]	624	1	0	0.9	WP_045295610.1	gtgggttttgtaccgatcacggatgatcggcgcttggcggcgaaagagtactttcatgggaaaacgaagattcgtagaattcaggatgattttcacaactacatgaacaaacgtgggtatgatattgagcgtggcgagccgagcgagctgcagcataagagtgtccatgagtttaagaaacaagaacgtgaaaaagagctaaagcatctgcaacaattagtcgctcacaaggaaaaagagcttcaaggtatggataatttgctagagttaaaaacagcaccacccgttgagatacgtagcgagagacggattgaagagttatgtagtcaacctcttgaagtggaggcggccaagagtgtcatgagttccaaagtaaaagtggaagaagcagattttcat…	MGFVPITDDRRLAAKEYFHGKTKIRRIQDDFHNYMNKRGYDIERGEPSELQHKSVHEFKKQEREKELKHLQQLVAHKEKELQGMDNLLELKTAPPVEIRSERRIEELCSQPLEVEAAKSVMSSKVKVEEADFHELMSLTKELQQTLAAEHERTHALSHEVDRYEKENKALKHDLSETKQELEIYVAHQDGEVEKAKKQMRQKLVRDFSAEQKENVKDEVKRELDTQYKAHISSLSDDLMIEKQKREKTKKELVQANKLNDSLTEMNIDYIANYVPKEELDKANQEVNELRKENKTLKAWKEKALNWIDKHVERIKQVSFFQHVGGVQKRNKRQDQEIER
p4	2	179	hypothetical protein	sporulation protein [Bacillus aryabhattai]	110	1	7e-30	0.97	WP_053001458.1	gtgaggggaatattggagtctcataaagtgattttaaaagaagctttaaccgttgagattgaaaaagagagaaaatttttgatagaaacggcatttaaagagggttttacaagtaacaacacggtagagattagtcaatttattgatgatatgttaaatgaattagaaaagattaaatag	MRGILESHKVILKEALTVEIEKERKFLIETAFKEGFTSNNTVEISQFIDDMLNELEKIK
p4	3	1112	FIG00675607: hypothetical protein	Protein containing gellan lyase domain [Bacillus smithii]	461	0.82	2e-157	0.75	AKP46590.1	atggttacattgactagcaattcccctagtattaacttttcttctaatcccattattacagactccaatggtactttcacaactgtattaaatgtaacccctcgtactatttctactcttgtaactataactgcattaacttccgtaaatggtgaacttatttcaacatcagtaactactaccgtttcatgtccatcattagaagctgtaaacgcagcacaaaatatagccgaaatgcgagctgctattgaagatcctcaacttggactagatctcacagcatacaataaccttacagatgcacaaaaaaatcaagtagccaatacagtattaatgaatagaccgccatcaggatatcctactgtagctagtgtacaaatagcacttaataatgcaatt…	MVTLTSNSPSINFSSNPIITDSNGTFTTVLNVTPRTISTLVTITALTSVNGELISTSVTTTVSCPSLEAVNAAQNIAEMRAAIEDPQLGLDLTAYNNLTDAQKNQVANTVLMNRPPSGYPTVASVQIALNNAIDSIVDPNNVFVRAGSVGGNGSRANPFGTIQEGITAVNIGGTVHILEGTYPITTQINVNKSDITLLGENDPLLLLEADLIPILITASGVTIDDLTITSDIPYAKEFIQVGANNVSLLNNTIYGPSQVLPMSNWVVNRAVVSQVGISNILLEGNTFYSLRTGMYINPNTTGAINNNVVYNTKGGFLVDRAFTTFLGNSWGIPPNEFDIVLLAGTTMGPPYNNIPALKAANNNATISDQR
p4	4	212	hypothetical protein	ribonuclease BN [Bacillus subtilis]	70.5	0.84	6e-14	0.56	KJJ40563.1	atgttcatgcaaaacaaatctattttagcttatgtcctaatacttttaacatttatagtaccagtttatttattcattaactcaaaagttttaatacctaaagggtatgaattagctattgacggctatttaatatctagaactttaatctttatctttattttgtacttattatctaaatttggatattttcttttaaataaaaaagattag	MFMQNKSILAYVLILLTFIVPVYLFINSKVLIPKGYELAIDGYLISRTLIFIFILYLLSKFGYFLLNKKD
p4	5	542	hypothetical protein	hypothetical protein [Bacillus subtilis]	172	0.97	3e-50	0.54	WP_032732005.1	atggttaatagtaaaattaaaaaagcattagttgggtctttaatgtcagctgttacttttacagttttaattacaccgaatcaagctagtgcagctgaaaaacctattcttcatcaagacaaaacttctgtgaacacgcaaacaaatgacatacatgcatcatttgtcaacgactaccgtaacgtaaaaaagaatgtaaaaaaatctacaagttggtctagttacaaaagagtttcagataatatagctactggatctaaaggcggtagcatttctgcaactaaaagtgtaactttcaatcctagtgtaaaaggtaacatatccggtttggatattaatgtaggtggttctataagtagcacggtaggttatacattaaatgccggtgctaataaaaga…	MVNSKIKKALVGSLMSAVTFTVLITPNQASAAEKPILHQDKTSVNTQTNDIHASFVNDYRNVKKNVKKSTSWSSYKRVSDNIATGSKGGSISATKSVTFNPSVKGNISGLDINVGGSISSTVGYTLNAGANKRVYMAYRVKYNVETGVNHRVDIVTGKTVSKSNYTVKKPMYGEYKLINY
p4	6	524	hypothetical protein	LP1G.22 [Lysinibacillus sphaericus]	92	0.96	9e-20	0.34	WP_011154348.1	atgggggctagtatgatgctggtaaaaaagatgttaaatggaattatgatgaaagaaatcactattaaagaattagctgatcgatatgatgtaagtactcgtaccattcaatcaaagattaagaaattaggttatgaatgggacagtaaggaaagtatttatcgctatgttggagaagaatcagaacctgtagatgttgatttcagtacccttatttctaaaaacagtaaaatgctagcagaacaaaagctagctaatagccaagtagcagctagtattagctatttaaatgaaagtgaaagcactagtgctagttcttcaaaagctagtacaactactagcaaagtagatgcaattgatatcttgctgcagaattcgaaggatcgctctaaaagagta…	MGASMMLVKKMLNGIMMKEITIKELADRYDVSTRTIQSKIKKLGYEWDSKESIYRYVGEESEPVDVDFSTLISKNSKMLAEQKLANSQVAASISYLNESESTSASSSKASTTTSKVDAIDILLQNSKDRSKRVYRGFYFDDDVLSIIDQVPKSYKSELVNEALRKVFKEKGLLD
p4	7	635	hypothetical protein	replication protein MZFP585 [Bacillus cereus]	252	0.89	5e-81	0.64	ACR78189.1	atgtattctaacacaataaggttagttccttccactactaaatggaggaatttaaaaatgcagaaagcattacaagaagccgaaaaaaaagctagattacgagaaattgaaaacggtaaagttctaactgaagaagaattaaattatgcgaacgaacttcaagccaaagctaattcaaagggaatgaaattggttccagaaagaaaaattaagaataaagtgaggtttgtacagttgattcaagaaaatattttatatttaagagatataaaatacttaaccactgctgagaaaaactttttaatggatctagttcctaatgttgaattttcttctaactgtatagttaatgattctagacaggttaattcacttcctgttactcaaagtgaccttgca…	MYSNTIRLVPSTTKWRNLKMQKALQEAEKKARLREIENGKVLTEEELNYANELQAKANSKGMKLVPERKIKNKVRFVQLIQENILYLRDIKYLTTAEKNFLMDLVPNVEFSSNCIVNDSRQVNSLPVTQSDLAEILGKKKQNINPIIKGLIDKGILARSESGVEDNNVRAYALFINPHIMFSGDKDNVNGTLKAMFRKTPKELKSLPVKLF
p4	8	122	hypothetical protein	No significant similarity found.						gtgagaagagataactttttaaaagtatctcgaacacttgatactaaaggatttatgtctaatttcgtagtaatgatttttcattactttggtaatgaaaaatcattactacgaaaacaataa	MRRDNFLKVSRTLDTKGFMSNFVVMIFHYFGNEKSLLRKQ
p5	1	161	hypothetical protein	plasmid recombination enzyme [Bacillus aryabhattai]	91.7	0.84	2e-20	1	WP_045295610.1	gtggcgcatcaagatggcgaagtggaaaaggccaaaaaacaaatgcgtcagaagcttgtccgtgatttttctgctgaacagaaggaaaatgtaaaagatgaggttaaaagagaactagatacgcaatataaagcccataaagctctctcagcgatgatttaa	MAHQDGEVEKAKKQMRQKLVRDFSAEQKENVKDEVKRELDTQYKAHKALSAMI
p5	2	209	hypothetical protein	plasmid recombination enzyme [Bacillus megaterium]	88.6	0.94	1e-18	0.68	WP_012209780.1	atgattgagaagcagaaacgtgagaaaacgaaaaaagagcttgtacaggcaaataaactgaatgacagtttaacagaaatgaacattgactatatagccaattatgtcccaaaagaagagcttgataaagcgaatcaagaggttaatgaattacgaaaagaaaataacattaaaagcttggaaggaaaaagcattgaattggatcgataa	MIEKQKREKTKKELVQANKLNDSLTEMNIDYIANYVPKEELDKANQEVNELRKENNIKSLEGKSIELDR
p5	3	179	hypothetical protein	sporulation protein [Bacillus aryabhattai]	110	1	7e-30	0.97	WP_053001458.1	gtgaggggaatattggagtctcataaagtgattttaaaagaagctttaaccgttgagattgaaaaagagagaaaatttttgatagaaacggcatttaaagagggttttacaagtaacaacacggtagagattagtcaatttattgatgatatgttaaatgaattagaaaagattaaatag	MRGILESHKVILKEALTVEIEKERKFLIETAFKEGFTSNNTVEISQFIDDMLNELEKIK
p5	4	779	FIG00675607: hypothetical protein	Protein containing gellan lyase domain [Bacillus smithii]	391	0.99	1e-131	0.76	AKP46590.1	atgaatagaccgccatcaggatatcctactgtagctagtgtacaaatagcacttaataatgcaattgactccattgttgaccctaacaatgtatttgttcgtgcaggttcagtaggaggaaatggaagtagagcaaacccttttggaactattcaagaaggaataacggcagttaatatagggggtaccgtccatattttagaaggtacctatccaataacaactcaaattaatgtaaataaatcagatattacattattaggtgaaaatgatcctctcttattattagaagcagatctaattcctatattaataacagctagtggtgtcactattgatgatttgactataacaagtgatattccctatgcaaaagaatttattcaagtaggagcaaat…	MNRPPSGYPTVASVQIALNNAIDSIVDPNNVFVRAGSVGGNGSRANPFGTIQEGITAVNIGGTVHILEGTYPITTQINVNKSDITLLGENDPLLLLEADLIPILITASGVTIDDLTITSDIPYAKEFIQVGANNVSLLNNTIYGPSQVLPMSNWVVNRAVVSQVGISNILLEGNTFYSLRTGMYINPNTTGAINNNVVYNTKGGFLVDRAFTTFLGNSWGIPPNEFDIVLLAGTTMGPPYNNIPALKAANNNATISDQR
